# Supplementary material for: Systematic review and meta-analyses on associations of endogenous testosterone concentration with health outcomes in community-dwelling men
Source: PubMed Central journal article supplement — BMJ Open. 2021 Nov 2;11(11):e048013. doi: 10.1136/bmjopen-2020-048013 (PMC8565564; doi:10.1136/bmjopen-2020-048013), 2021-11-02
Supplement: bmjopen-2020-048013supp001.pdf [file bmjopen-2020-048013supp001.pdf]

*Supplementary Material. Systematic review: associations of testosterone with men's health.*

|    |                                                                                             |    |
|----|---------------------------------------------------------------------------------------------|----|
| 1  | <b>1. Table of Contents</b>                                                                 |    |
| 2  | 1. Table of Contents.....                                                                   | 1  |
| 3  | 2. Additional details on systematic searches and screening .....                            | 2  |
| 4  | 3. Tables.....                                                                              | 7  |
| 5  | Supplementary table 1. Full electronic search strategy used for MEDLINE database.....       | 7  |
| 6  | Supplementary table 2: Selection criteria for screening items returned from the literature  |    |
| 7  | search. ....                                                                                | 8  |
| 8  | Supplementary table 3: Adaptation of screening rules for different types of published and   |    |
| 9  | unpublished items. ....                                                                     | 9  |
| 10 | Supplementary table 4. Words mentioned in the titles or abstracts of reviewed items. ....   | 10 |
| 11 | Supplementary table 5. PRISMA Checklist.....                                                | 11 |
| 12 | Supplementary table 6. Attributes of selected items.....                                    | 14 |
| 13 | Supplementary table 7. Exposure levels, outcome assessment, covariates .....                | 18 |
| 14 | Supplementary table 8. Newcastle-Ottawa Quality Assessment Scale for Cohort Studies:        |    |
| 15 | selected articles. ....                                                                     | 21 |
| 16 | Supplementary table 9. Extracted hazard ratio data for dose-response meta-analyses (DR-     |    |
| 17 | MAs). ....                                                                                  | 22 |
| 18 | Supplementary table 10. Published estimates for selected studies investigating associations |    |
| 19 | of total testosterone with cognitive status or decline .....                                | 26 |
| 20 | 4. Figures. ....                                                                            | 27 |
| 21 | Supplementary figure 1. Meta-regression diagnostics.....                                    | 27 |
| 22 | Supplementary figure 2. Funnel plots for dose-response meta-analyses.....                   | 29 |
| 23 | Supplementary figure 3: Forest plot of published hazard ratio (HR) estimates: association   |    |
| 24 | of testosterone with other AIMS outcomes. ....                                              | 30 |
| 25 | 5. References cited.....                                                                    | 31 |
| 26 |                                                                                             |    |
| 27 |                                                                                             |    |
| 28 |                                                                                             |    |

*Supplementary Material. Systematic review: associations of testosterone with men's health.*

29 **2. Additional details on systematic searches and screening**

30  
31 We used online search tools to identify available published (MEDLINE, EMBASE) and grey  
32 literature (OpenGrey, Mednar) *items* (journal articles, reports, theses, webpage articles)  
33 reporting on suitable prospective cohort *studies* (the underlying unique sources of data). We  
34 used OpenGrey and Mednar because both were free search tools that we considered likely to  
35 identify additional grey literature items and studies in an expanded search beyond the  
36 mainstream publications. Mednar is a medically-focussed search engine of public and deep  
37 web resources, excluding subscription services.[1] OpenGrey is a searchable database  
38 containing citations for items including technical or research reports, theses, conference  
39 papers, and other types of grey literature.[2] Literature searches were conducted on 18-22  
40 July 2019, with no date restrictions set.

41  
42 Where possible (as functionality varied among the different tools), we placed the following  
43 restrictions on the search: items reporting on the results of a research study, longitudinal or  
44 prospective cohort studies, not of hormone therapy or deprivation treatments. Due to study  
45 timeframe and language translation limitations, we opted to search for only those items that  
46 were reported in the English language. The terms and full criteria used for the MEDLINE  
47 search are provided in Supplementary table 1, and the PRISMA checklist as Supplementary  
48 table 5.

49  
50 Selection criteria were set as applicable to the planned sets of IPD meta-analyses  
51 (Supplementary table 2).[3] Only items reporting on prospective population-based cohort  
52 studies, adults of combined sexes or of men alone, with individuals free of the disease at  
53 baseline, were sought. Items reporting a different design for the analysis of longitudinal data,  
54 such as nested case-control or case-cohort design, were also considered acceptable. A

*Supplementary Material. Systematic review: associations of testosterone with men's health.*

55 minimum of five years follow-up was selected, to ensure a sufficient number of incident  
56 events for statistical modelling. We excluded items that did not measure testosterone using  
57 mass spectrometry, which is regarded to be the 'gold standard' method,[4] although  
58 testosterone was not required to be mentioned in the title or abstract, nor modelled as the  
59 primary exposure variable. Selected items were to be studies of humans, reported in English,  
60 and reporting on analyses of at least one of the AIMS outcomes.

61

62 Two reviewers (RJM, JH) independently screened the de-duplicated items against these pre-  
63 specified criteria. To optimise efficiency, the selection of items proceeded in two steps. Title  
64 and abstract screenings (Step 1) were followed by full text screening of items selected in Step  
65 1 (Step 2). If an item was selected for exclusion, then the main reason for that decision was  
66 recorded. If there was uncertainty in the decision to exclude, in Step 1 the reviewer selected  
67 "include" (in Step 1) or "maybe" (in Step 2). At the end of each step, the two reviewers  
68 sought to achieve consensus, through discussion, for each item that did not achieve  
69 agreement. Exclusion reasons were used to inform discussions for achieving consensus. Items  
70 with a consensus decision of "maybe" were further investigated by Reviewer 1 (RJM) using  
71 information external to the systematic searches and screenings (reading further details of  
72 methods used in cited articles, and from correspondence with authors or other researchers  
73 currently working on the research study).

74

75 This screening procedure was adjusted to accommodate the different types of items reviewed  
76 (published articles, theses, webpage articles, unpublished reports; Supplementary table 3). A  
77 pilot set of title-only screenings for 30 randomly chosen articles suggested that sufficient

*Supplementary Material. Systematic review: associations of testosterone with men's health.*

78 information was contained within the titles alone for the purpose of Step 1 screenings.<sup>a</sup>  
79 Therefore, in cases when an abstract was not available, only the titles were screened. Website  
80 items identified by the Mednar search tool were the type of item that most often did not have  
81 abstract or summary text, and in these cases the webpage text was reviewed in place of an  
82 abstract (Supplementary table 3).  
83  
84 Endnote X8[5] was used for collating and storing the citations returned from literature  
85 searches, and for de-duplicating and storing the selected references. The full citations,  
86 including abstracts, were exported from Endnote for uploading into Rayyan[6], which is a  
87 free web tool that was used for screening, recording exclusion decisions, and downloading  
88 selection results.  
89  
90 The literature search identified 2,177 items (1,738 published and 439 from grey literature),  
91 with 1,994 items remaining after duplicates had been removed, and after excluding two  
92 Mednar items that had insufficient information available to review (Fig. 1). Supplementary  
93 table 4 shows the frequencies of returned items by search terms present in the titles and  
94 abstracts. Most (72.7%) had the word “cancer”, and 1,107 (55.5%) of these had the word  
95 “prostate cancer”, in the title or abstract. This, combined with frequent mentions of  
96 “androgen deprivation” (29.2%), “radiotherapy” (18.6%), and “brachytherapy” (8.3%), show  
97 that items reporting aspects of testosterone deprivation or suppression for treating prostate  
98 cancer were a predominant feature of the returned items. Different types of returned items  
99 included 1,764 published articles, 111 webpage articles, 81 theses, and 38 unpublished  
100 reports/other documents, and the percentages without abstract or webpage text screened in

---

<sup>a</sup> 30 titles were initially screened at random. 18 were flagged as not suitable, leaving 12 as potentially suitable. Subsequent Step 1 screening of titles with abstracts selected 25 of these articles for exclusion, with 5 retained for Step 2 (full text screening). All 5 were flagged as being potentially suitable in the pilot set of title-only screenings.

*Supplementary Material. Systematic review: associations of testosterone with men's health.*

101 Step 1 were 2.6%, 1.8%, 24.7%, 65.8%, respectively (i.e., 4.7% overall).

102

103 One thousand nine hundred sixty-eight items were excluded, five items were classified as  
104 “Maybe”, and one item could not be screened because the full text version was not available,  
105 leaving n = 20 suitable items selected (Fig. 1). Most (92.1%) of the exclusions were made  
106 from reviewing titles and abstracts at Step 1, with a further 6.6% excluded from screening of  
107 the 157 full text items in Step 2. Inter-reader agreement was a Cohen's Kappa  $\kappa = 0.69$   
108 (or 96.0 percent agreement) for Step 1 and  $\kappa = 0.82$  (or 98.1 percent agreement) for Step 2.  
109 Percentages of items with search terms (AIMS outcomes) in the title or abstract increased  
110 after Step 1 in most cases except for “cancer” and “prostate cancer” (Supplementary table 4).  
111 This reflects many exclusions in Step 1 that were of items reporting research on testosterone  
112 deprivation or suppression treatments for prostate cancer.

113

114 The systematic approach to literature searching and screening is widely held to be beneficial  
115 to identifying studies that otherwise may not have been considered for inclusion, and thus to  
116 minimise the prospect for reviewer biases affecting study selections and summary results.[7]  
117 This process is not perfect though, and in our case it did not identify two prospective cohort  
118 studies that were known to be suitable, prior to commencing this review (FHS, MAILES).[3]  
119 In the case of MAILES, this was one of the more recently commenced of the selected studies,  
120 with its cohort profile article published in 2014,[8] and accordingly has had a comparatively  
121 short timeframe within which to analyse and publish suitable findings. In the case of FHS,  
122 associations of endogenous testosterone with male health outcomes had previously been  
123 investigated and published, but not using mass spectrometry for measuring testosterone.[9,  
124 10] Those articles were identified in the literature search but had been excluded on account of  
125 assay method. Only relatively recently have testosterone measures been re-assayed for FHS

*Supplementary Material. Systematic review: associations of testosterone with men's health.*

126 participants using mass spectrometry methods.[11] One article by Pencina et al[12] was  
127 possibly within scope but not identified because it had not been entered into the MEDLINE  
128 database prior to the literature search (article entry date = 14 May 2020). Furthermore, an  
129 article that presented suitable estimates from one of the selected studies by Yeap et al[13]  
130 was not identified from the literature search because it did not have “prospective”, “follow-  
131 up”, “cohort study” or “longitudinal study” terms in its title or abstract, nor any of the  
132 corresponding MeSH terms listed (refer to Supplementary table 1 for search terms used).

133

134 In expanding our literature search to unpublished grey literature, it successfully located one  
135 suitable item, which was a link to a Web MD webpage article, with further details published  
136 in a conference abstract by Sueoka et al[14] that would otherwise have not been returned  
137 from searching only the MEDLINE and EMBASE databases.

138

*Supplementary Material. Systematic review: associations of testosterone with men's health.*139 **3. Tables**140 Supplementary table 1. Full electronic search strategy used for MEDLINE database.

141

142 The following is the search that was conducted on 18 July 2019 using MEDLINE.

143

144 1. Testosterone/ or Androgens/

145 2. (testosterone or androgen\* or sex hormone\* or sex steroid\*).ti.

146 3. (testosterone or androgen\*).ab.

147 4. cardiovascular diseases/ or heart diseases/ or heart failure/ or vascular diseases/ or stroke/

148 or myocardial infarction/ or coronary disease/ or cerebrovascular disorders/

149 5. (cardiovascular or stroke or myocardial infarction or heart failure).ti.

150 6. neoplasms/ or colorectal neoplasms/ or lung neoplasms/ or prostatic neoplasms/

151 7. cancer.ti.

152 8. mortality/ or mortality.ti.

153 9. dementia/ or cognition/ or dementia.ti. or cognit\*.ti.

154 10. Aging/psychology or Neuropsychological Tests/

155 11. 1 or 2 or 3

156 12. 4 or 5 or 6 or 7 or 8 or 9 or 10

157 13. 11 and 12

158 14. longitudinal studies/ or prospective studies/ or follow-up studies/ or cohort studies/

159 15. (prospective or follow-up or cohort study or longitudinal study).ti,ab.

160 16. 14 or 15

161 17. 13 and 16

162 18. (exogenous or replacement or therapy or hormone treatment).ti.

163 19. Hormone Replacement Therapy/

164 20. 18 or 19

165 21. 17 not 20

166 22. limit 21 to humans

167 23. limit 22 to english language

168 24. limit 23 to (adaptive clinical trial or address or autobiography or bibliography or

169 biography or case reports or clinical trial, all or clinical trial, phase i or clinical trial, phase ii

170 or clinical trial, phase iii or clinical trial, phase iv or clinical trial, veterinary or clinical trials,

171 veterinary as topic or clinical trial protocol or clinical trial or comment or controlled clinical

172 trial or dictionary or editorial or lecture or legislation or meta analysis or practice guideline or

173 pragmatic clinical trial or published erratum or randomized controlled trial or retracted

174 publication or "retraction of publication" or "review" or "scientific integrity review" or

175 "systematic review")

176 25. Retrospective Studies/ or Case-Control Studies/ or (retrospective analysis or case-

177 control).ti.

178 26. 24 or 25

179 27. 23 not 26

180

181 Notes:

182

183 Terms with a trailing "/" are MeSH terms and those with a trailing "\*" are truncated search

184 strings. Beforehand, a search of PROSPERO was conducted for another suitable strategy but

185 none were found. However, the above strategy is based upon one that has been used for a

186 similar study.[15] This search strategy is also published in the protocol article for the

187 Androgens In Men Study.[3]

## Supplementary Material. Systematic review: associations of testosterone with men's health.

188 **Supplementary table 2: Selection criteria for screening items returned from the literature search.** If neither Include nor Exclude could be selected for Step  
189 1, then reviewer selected "Include".

|                                                              | Exclude                                                                                                                                                                                                                                                                          | Include                                                                                                                                                                                                      | Rationale                                                                                                                                                                                                                                                                                                                                                                                     | Used in Step 1              |                     | Used in Step 2 |
|--------------------------------------------------------------|----------------------------------------------------------------------------------------------------------------------------------------------------------------------------------------------------------------------------------------------------------------------------------|--------------------------------------------------------------------------------------------------------------------------------------------------------------------------------------------------------------|-----------------------------------------------------------------------------------------------------------------------------------------------------------------------------------------------------------------------------------------------------------------------------------------------------------------------------------------------------------------------------------------------|-----------------------------|---------------------|----------------|
|                                                              |                                                                                                                                                                                                                                                                                  |                                                                                                                                                                                                              |                                                                                                                                                                                                                                                                                                                                                                                               | Title & Abstract            |                     | Full-text      |
|                                                              |                                                                                                                                                                                                                                                                                  |                                                                                                                                                                                                              |                                                                                                                                                                                                                                                                                                                                                                                               | Title only<br>(no abstract) | Title &<br>Abstract |                |
| <b>Article type:</b>                                         | Reviews, comments/opinion pieces, systematic reviews, dictionary, fact sheet, website information about diseases, fact sheets, etc.                                                                                                                                              | Research study article / report, or an article that specifically refers to the results of one (e.g., a webpage referring to unpublished data).                                                               | These searches were of both published and unpublished scientific literature for the purpose of identifying prospective cohort studies that are likely to have the relevant data for planned IPD meta-analyses                                                                                                                                                                                 | Yes                         | Yes                 | Yes            |
| <b>Study type:</b>                                           | Retrospective or cross-sectional designs, case studies, case-control, surveys, RCTs or other trials, experiments, evaluation of androgen / testosterone therapy / deprivation / HRT or the effectiveness of any other type of intervention / surgery / treatment, genetics, etc. | Prospective cohort study.                                                                                                                                                                                    | A prospective cohort study design is of incident health outcomes for investigating etiology or disease risk for a cohort free of disease at baseline, and ideally should be representative of the local population, but may or may not be some demographic subset: e.g., age range, sex, ethnicity type.                                                                                      | Yes                         | Yes                 | Yes            |
| <b>Population</b> (at baseline/date of recruitment to study) | Studies of juveniles only<br>Studies of females only<br>Individuals with some specific health condition/characteristic or following surgery / other medical treatment for specific illness                                                                                       | Adults (18 yr or older)<br>Not females only<br>Community-dwelling men                                                                                                                                        | The study is of community-dwelling men.                                                                                                                                                                                                                                                                                                                                                       | Yes                         | Yes                 | Yes            |
| <b>Exposure</b> (at baseline)                                | Do not exclude studies that do not model testosterone as the exposure: although it should be shown that it was measured for participants. If not mentioned in Step 2 then Exclude.                                                                                               | Endogenous testosterone                                                                                                                                                                                      | This will be the focal exposure for all IPD meta-analyses. However, as we are focussing on the identification of only those studies who have suitable androgen measurements available in IPD data, then testosterone does not necessarily need to be modelled as the focal exposure in included items. It is likely that details on the methods will be available only from full-text review. | Only if available           | Only if available   | Yes            |
|                                                              | Testosterone not measured using mass spectrometry                                                                                                                                                                                                                                | Testosterone assay of serum or plasma sample using mass spectrometry (lc-ms or gc-ms)                                                                                                                        |                                                                                                                                                                                                                                                                                                                                                                                               | Only if available           | Only if available   | Yes            |
| <b>Outcome</b> (at follow-up)                                | Incident outcome not one of those type of events specified for inclusion.                                                                                                                                                                                                        | Diagnosis/event of: cardiovascular disease (any); cancer (any); dementia. Deaths (any cause); deaths due to any type of cardiovascular disease; deaths due to any type of cancer. Cognition change / outcome | These are the outcomes for the planned IPD meta-analyses so it is important to seek IPD datasets from those studies who have already modelled these outcomes.<br><br>We refer to these as the "AIMS outcomes".                                                                                                                                                                                | Yes                         | Yes                 | Yes            |
|                                                              | Less than 5 years of follow-up data                                                                                                                                                                                                                                              | Five or more years of follow-up data, with outcomes identified using systematic follow-up or data linkage.                                                                                                   | As consistent across all included studies for IPD meta-analyses and set <i>a priori</i> . Likely that this will be available only from full-text review so not included Step 1.                                                                                                                                                                                                               | No                          | No                  | Yes            |
| <b>Language</b>                                              | Title and/or abstract of article not in English                                                                                                                                                                                                                                  | Title and/or abstract of article in English                                                                                                                                                                  | As limited by the timeframe of this study and the native language of reviewers (a practicality).                                                                                                                                                                                                                                                                                              | Yes                         | Yes                 | Yes            |
| <b>Species</b>                                               | Studies not of humans                                                                                                                                                                                                                                                            | Studies of humans                                                                                                                                                                                            | We are studying humans.                                                                                                                                                                                                                                                                                                                                                                       | Yes                         | Yes                 | Yes            |

190



*Supplementary Material. Systematic review: associations of testosterone with men's health.*

191 Supplementary table 3: Adaptation of screening rules for different types of published and  
 192 unpublished items.  
 193

| <b>Item Type</b>                    | <b>Step 1</b>                               | <b>Step 2</b>                                                                                                                                          |
|-------------------------------------|---------------------------------------------|--------------------------------------------------------------------------------------------------------------------------------------------------------|
| Published article                   | Screen title (and abstract <sup>a</sup> )   | Screen full text article                                                                                                                               |
| Thesis                              | Screen title (and abstract <sup>a</sup> )   | Screen full thesis                                                                                                                                     |
| Unpublished report / other document | Screen title (and abstract <sup>a,b</sup> ) | Screen full document                                                                                                                                   |
| Webpage                             | Screen title and webpage <sup>c</sup>       | Screen full text article/document as identified from the webpage, or from a google search of information provided about the article, from the webpage. |

194

195 <sup>a</sup> = when an abstract was available, otherwise title-only decisions were made (see  
 196 Supplementary table 2).

197 <sup>b</sup> = or, if not an abstract, other suitable document summary, as returned by the search tool.

198 <sup>c</sup> = for webpage articles, the webpage text served as the proxy for an abstract, with the  
 199 proviso that the reviewer did not navigate to additional webpages during Step 1.

200

*Supplementary Material. Systematic review: associations of testosterone with men's health.*201 Supplementary table 4. Words mentioned in the titles or abstracts of reviewed items.<sup>a</sup>

| Word(s)                                             | Step 1 items<br>(n=1,994) | Step 2 items<br>(n=158) | Selected items<br>(n=20) |
|-----------------------------------------------------|---------------------------|-------------------------|--------------------------|
| <i>Search terms (AIMS outcomes)</i>                 |                           |                         |                          |
| cancer                                              | 1,449 (72.7)              | 72 (45.6)               | 6 (30.0)                 |
| colorectal cancer                                   | 9 (0.5)                   | 4 (2.5)                 | 2 (10.0)                 |
| lung cancer                                         | 10 (0.5)                  | 6 (3.8)                 | 2 (10.0)                 |
| prostate cancer                                     | 1,107 (55.5)              | 40 (25.3)               | 2 (10.0)                 |
| cardiovascular                                      | 219 (11.0)                | 49 (31)                 | 15 (75.0)                |
| heart failure                                       | 29 (1.5)                  | 2 (1.3)                 | 1 (5.0)                  |
| stroke                                              | 31 (1.6)                  | 12 (7.6)                | 4 (20.0)                 |
| myocardial infarction                               | 33 (1.7)                  | 7 (4.4)                 | 1 (5.0)                  |
| mortality                                           | 232 (11.6)                | 45 (28.5)               | 9 (45.0)                 |
| dementia                                            | 22 (1.1)                  | 8 (5.1)                 | 2 (10.0)                 |
| cognit*                                             | 87 (4.4)                  | 20 (12.7)               | 4 (20.0)                 |
| <i>Other frequently observed (not search terms)</i> |                           |                         |                          |
| androgen deprivation                                | 583 (29.2)                | 2 (1.3)                 | 0 (0.0)                  |
| androgen receptor                                   | 235 (11.8)                | 10 (6.3)                | 0 (0.0)                  |
| brachytherapy                                       | 165 (8.3)                 | 0 (0.0)                 | 0 (0.0)                  |
| breast cancer                                       | 153 (7.7)                 | 9 (5.7)                 | 0 (0.0)                  |
| radiotherapy                                        | 371 (18.6)                | 0 (0.0)                 | 0 (0.0)                  |

202 <sup>a</sup> = Items summarised as numbers (percentages); \*= wildcard character designating truncation

*Supplementary Material. Systematic review: associations of testosterone with men's health.*

Supplementary table 5. PRISMA Checklist.

| Section/topic             | # | Checklist item                                                                                                                                                                                                                                                                                              | Reported on page #                            |
|---------------------------|---|-------------------------------------------------------------------------------------------------------------------------------------------------------------------------------------------------------------------------------------------------------------------------------------------------------------|-----------------------------------------------|
| <b>TITLE</b>              |   |                                                                                                                                                                                                                                                                                                             |                                               |
| Title                     | 1 | Identify the report as a systematic review, meta-analysis, or both.                                                                                                                                                                                                                                         | 1                                             |
| <b>ABSTRACT</b>           |   |                                                                                                                                                                                                                                                                                                             |                                               |
| Structured summary        | 2 | Provide a structured summary including, as applicable: background; objectives; data sources; study eligibility criteria, participants, and interventions; study appraisal and synthesis methods; results; limitations; conclusions and implications of key findings; systematic review registration number. | 2-3                                           |
| <b>INTRODUCTION</b>       |   |                                                                                                                                                                                                                                                                                                             |                                               |
| Rationale                 | 3 | Describe the rationale for the review in the context of what is already known.                                                                                                                                                                                                                              | 4-5                                           |
| Objectives                | 4 | Provide an explicit statement of questions being addressed with reference to participants, interventions, comparisons, outcomes, and study design (PICOS).                                                                                                                                                  | 5. For this type of review it is PEO instead. |
| <b>METHODS</b>            |   |                                                                                                                                                                                                                                                                                                             |                                               |
| Protocol and registration | 5 | Indicate if a review protocol exists, if and where it can be accessed (e.g., Web address), and, if available, provide registration information including registration number.                                                                                                                               | 5                                             |
| Eligibility criteria      | 6 | Specify study characteristics (e.g., PICOS, length of follow-up) and report characteristics (e.g., years considered, language, publication status) used as criteria for eligibility, giving rationale.                                                                                                      | 5, Supplementary table 2                      |
| Information sources       | 7 | Describe all information sources (e.g., databases with dates of coverage, contact with study authors to identify additional studies) in the search and date last searched.                                                                                                                                  | 5-6                                           |
| Search                    | 8 | Present full electronic search strategy for at least one database, including any limits used, such that it could be repeated.                                                                                                                                                                               | Supplementary table 1                         |
| Study selection           | 9 | State the process for selecting studies (i.e., screening, eligibility, included in systematic review, and, if applicable, included in the meta-analysis).                                                                                                                                                   | 5-6, Supplementary tables 2-3.                |

*Supplementary Material. Systematic review: associations of testosterone with men's health.*

| Section/topic                      | #  | Checklist item                                                                                                                                                                                                         | Reported on page #                      |
|------------------------------------|----|------------------------------------------------------------------------------------------------------------------------------------------------------------------------------------------------------------------------|-----------------------------------------|
| Data collection process            | 10 | Describe method of data extraction from reports (e.g., piloted forms, independently, in duplicate) and any processes for obtaining and confirming data from investigators.                                             | 6, Suppl. Data.                         |
| Data items                         | 11 | List and define all variables for which data were sought (e.g., PICOS, funding sources) and any assumptions and simplifications made.                                                                                  | 6, Suppl. Data.                         |
| Risk of bias in individual studies | 12 | Describe methods used for assessing risk of bias of individual studies (including specification of whether this was done at the study or outcome level), and how this information is to be used in any data synthesis. | 6, Supplementary table 8.               |
| Summary measures                   | 13 | State the principal summary measures (e.g., risk ratio, difference in means).                                                                                                                                          | 7                                       |
| Synthesis of results               | 14 | Describe the methods of handling data and combining results of studies, if done, including measures of consistency (e.g., $I^2$ ) for each meta-analysis.                                                              | 7                                       |
| Risk of bias across studies        | 15 | Specify any assessment of risk of bias that may affect the cumulative evidence (e.g., publication bias, selective reporting within studies).                                                                           | 7                                       |
| Additional analyses                | 16 | Describe methods of additional analyses (e.g., sensitivity or subgroup analyses, meta-regression), if done, indicating which were pre-specified.                                                                       | 7                                       |
| <b>RESULTS</b>                     |    |                                                                                                                                                                                                                        |                                         |
| Study selection                    | 17 | Give numbers of studies screened, assessed for eligibility, and included in the review, with reasons for exclusions at each stage, ideally with a flow diagram.                                                        | 8, Fig. 1                               |
| Study characteristics              | 18 | For each study, present characteristics for which data were extracted (e.g., study size, PICOS, follow-up period) and provide the citations.                                                                           | Supplementary tables 6-7, 9-10          |
| Risk of bias within studies        | 19 | Present data on risk of bias of each study and, if available, any outcome level assessment (see item 12).                                                                                                              | 9, Supplementary table 8                |
| Results of individual studies      | 20 | For all outcomes considered (benefits or harms), present, for each study: (a) simple summary data for each intervention group (b) effect estimates and confidence intervals, ideally with a forest plot.               | 10-12, Figs 3-4; Supplementary figure 3 |

*Supplementary Material. Systematic review: associations of testosterone with men's health.*

| Section/topic               | #  | Checklist item                                                                                                                                                                       | Reported on page #                      |
|-----------------------------|----|--------------------------------------------------------------------------------------------------------------------------------------------------------------------------------------|-----------------------------------------|
| Synthesis of results        | 21 | Present results of each meta-analysis done, including confidence intervals and measures of consistency.                                                                              | 10-12, Figs 3-4; Supplementary figure 3 |
| Risk of bias across studies | 22 | Present results of any assessment of risk of bias across studies (see Item 15).                                                                                                      | 10-11, Supplementary figure 2           |
| Additional analysis         | 23 | Give results of additional analyses, if done (e.g., sensitivity or subgroup analyses, meta-regression [see Item 16]).                                                                | 10-12, Fig 2; Supplementary figures 1-3 |
| <b>DISCUSSION</b>           |    |                                                                                                                                                                                      |                                         |
| Summary of evidence         | 24 | Summarize the main findings including the strength of evidence for each main outcome; consider their relevance to key groups (e.g., healthcare providers, users, and policy makers). | 12-16                                   |
| Limitations                 | 25 | Discuss limitations at study and outcome level (e.g., risk of bias), and at review-level (e.g., incomplete retrieval of identified research, reporting bias).                        | 14-15                                   |
| Conclusions                 | 26 | Provide a general interpretation of the results in the context of other evidence, and implications for future research.                                                              | 13-16                                   |
| <b>FUNDING</b>              |    |                                                                                                                                                                                      |                                         |
| Funding                     | 27 | Describe sources of funding for the systematic review and other support (e.g., supply of data); role of funders for the systematic review.                                           | 17                                      |

From: Moher D, Liberati A, Tetzlaff J, Altman DG, The PRISMA Group (2009). Preferred Reporting Items for Systematic Reviews and Meta-Analyses: The PRISMA Statement. PLoS Med 6(7): e1000097. doi:10.1371/journal.pmed1000097

## Supplementary Material. Systematic review: associations of testosterone with men's health.

Supplementary table 6. Attributes of selected items.

| Item                                   | Article            | Country   | Study name <sup>§</sup> | Baseline**      |                 |                    | Follow-up (relevant outcomes) |                                                      |                                                                                                                                                                             |
|----------------------------------------|--------------------|-----------|-------------------------|-----------------|-----------------|--------------------|-------------------------------|------------------------------------------------------|-----------------------------------------------------------------------------------------------------------------------------------------------------------------------------|
|                                        |                    |           |                         | No. adult males | Baseline period | Age (yr) Mean (sd) | T (nmol/L) Mean (sd)          | Length of follow-up (yr) (person-years) <sup>¶</sup> | AIMS Longitudinal Outcomes (no. of events analysed)                                                                                                                         |
| <i>Selected from systematic review</i> |                    |           |                         |                 |                 |                    |                               |                                                      |                                                                                                                                                                             |
| 1                                      | Srinath, 2015[16]  | USA       | ARIC                    | 1,558           | 1996-98         | 63.1 (5.6)         | 13.9 (5.7)                    | Md=12.8 (CHD);<br>Md=13.1 (HF) (25,374; HF)          | Coronary Heart Disease (CHD; 287)<br>Heart Failure (HF; 104)<br>CHD deaths (29)<br>All-cause deaths (347)                                                                   |
| 2                                      | Srinath, 2016[17]  | USA       | ARIC                    | 1,558           | 1996-98         | 63.1 (5.6)         | 13.9 (5.7)                    | Md=14.1 (27,311)                                     | Ischemic Stroke (79)                                                                                                                                                        |
| 3                                      | Chan, 2016[18]     | Australia | BHS                     | 1,804           | 1994-95         | 50.3 (16.8)        | 13.6 (4.9)                    | Mn=14.9 (31,930)                                     | CVD events (234; 399)***<br>CVD deaths (71; 141)***<br>All-cause deaths (191; 319)***                                                                                       |
| 4                                      | Chasland, 2017[19] | Australia | BHS                     | 1,649           | 1994-95         | 49.8 (15.3)        | 13.7 (4.9)                    | Tot=20                                               | CVD events (415)<br>CVD deaths (127)                                                                                                                                        |
| 5                                      | Chan, 2018[20]     | Australia | BHS                     | 1,574           | 1994-95         | 51.1 (14.7)        | 13.5 (4.8)                    | Tot=20                                               | Prostate cancer (116)<br>Lung cancer (22)<br>Colorectal cancer (48)<br>Cancer (any; 289)                                                                                    |
| 6                                      | Hsu, 2015[21]      | Australia | CHAMP                   | 853             | 2005-07         | 76.9 (5.5)         | 14.6 (6.2)                    | Tot=5                                                | Cognitive decline (95)                                                                                                                                                      |
| 7                                      | Hsu, 2016[22]      | Australia | CHAMP                   | 1,705           | 2005-07         | 76.9 (5.5)         | 14.9 (6.6)                    | Md=6.9;<br>Tot=10 (11,764)                           | Cancer deaths (151)<br>CVD deaths (185)<br>Other deaths (174)<br>All-cause deaths (510)                                                                                     |
| 8                                      | Hsu, 2018[23]      | Australia | CHAMP                   | 1,651           | 2005-07         | 76.9 (5.5)         | 14.7 (6.4)                    | Tot=5                                                | All-cause deaths (382)<br>CVD deaths (cases not reported)<br>Cancer deaths (cases not reported)<br>Other deaths (cases not reported)<br>Change in: MMSE,<br>SF-12 (Mental). |

## Supplementary Material. Systematic review: associations of testosterone with men's health.

| Item | Article             | Country              | Study name <sup>§</sup> | Baseline**      |                 |                    |                      | Follow-up (relevant outcomes)                                             |                                                                                                                                                  |
|------|---------------------|----------------------|-------------------------|-----------------|-----------------|--------------------|----------------------|---------------------------------------------------------------------------|--------------------------------------------------------------------------------------------------------------------------------------------------|
|      |                     |                      |                         | No. adult males | Baseline period | Age (yr) Mean (sd) | T (nmol/L) Mean (sd) | Length of follow-up (yr) (person-years) <sup>¶</sup>                      | AIMS Longitudinal Outcomes (no. of events analysed)                                                                                              |
| 9    | Rosenberg, 2018[24] | USA                  | CHS                     | 1,019           | 1994            | 76.3 (4.9)         | 13.2 (6.2)           | Md=9.5 (10,716)                                                           | Atrial Fibrillation (304)                                                                                                                        |
| 10   | Shores, 2014a[25]   | USA                  | CHS                     | 1,032           | 1994            | 76.5 (5.2)         | 13.5 (6.1)           | Md=10; Tot=16 (19,220)                                                    | Ischemic stroke (114)                                                                                                                            |
| 11   | Shores, 2014b[26]   | USA                  | CHS                     | NR              | 1994            | NR                 | NR                   | Md=8.9 (CVD events)<br>Md=10.8 yr (All-cause deaths). (9,184; CVD events) | CVD events (436)<br>CVD deaths (157)<br>All-cause deaths (777)                                                                                   |
| 12   | Lee, 2013[27]       | Europe <sup>§§</sup> | EMAS                    | 2,736           | 2003-05         | 59.2 (10.7)        | 16.5 (6)             | Md=4.3; Tot=5 (14,486)                                                    | Cancer (any)<br>Myocardial Infarction (MI)<br>Heart Failure,<br>Other heart conditions<br>Stroke<br>Cognitive function<br>All-cause deaths (193) |
| 13   | Pye, 2014[28]       | Europe <sup>§§</sup> | EMAS                    | 2,599           | NR              | 60 (11)            | NR                   | Md=4.3; Tot=5 (11,140)                                                    | Cancer deaths (60)<br>CVD deaths (56)<br>All-cause deaths (147)                                                                                  |
| 14   | Chan, 2017[29]      | Australia            | HIMS                    | 3,690           | 2001-04         | 77 (3.6)           | 13.1 (4.9)           | Md=9.1, 9.2; Tot=11 (38,665)                                              | Prostate cancer (348)<br>Lung cancer (107)<br>Colorectal cancer (137)                                                                            |
| 15   | Ford, 2018[30]      | Australia            | HIMS                    | 4,069           | 2001-04         | NR                 | NR                   | Md=10.5; Tot=12 (44,404)                                                  | Dementia (499)                                                                                                                                   |
| 16   | Yeap, 2014[31]      | Australia            | HIMS                    | 3,690           | 2001-04         | NR                 | NR                   | Mn=6.6 (2.3 sd) (28,036)                                                  | MI (344)<br>Stroke (300)                                                                                                                         |

## Supplementary Material. Systematic review: associations of testosterone with men's health.

| Item                                                                                             | Article                    | Country   | Study name <sup>§</sup> | Baseline**      |                 |                                   | Follow-up (relevant outcomes) |                                                                                                                                  |
|--------------------------------------------------------------------------------------------------|----------------------------|-----------|-------------------------|-----------------|-----------------|-----------------------------------|-------------------------------|----------------------------------------------------------------------------------------------------------------------------------|
|                                                                                                  |                            |           |                         | No. adult males | Baseline period | Age (yr) Mean (sd)                | T (nmol/L) Mean (sd)          | Length of follow-up (yr) (person-years) <sup>¶</sup>                                                                             |
| 17                                                                                               | Ohlsson, 2010[32]          | Sweden    | MrOS                    | 2,644           | 2001-04         | 75.5 (3.2)                        | 15.6 (6.5)                    | Mn=4.5† (11,880)<br>CVD deaths (123)<br>Cancer deaths (127)<br>All-cause deaths (328)                                            |
| 18                                                                                               | Ohlsson, 2011[33]          | Sweden    | MrOS                    | 2,416           | 2001-04         | 75.4 (3.2)                        | 15.7 (6)                      | Md=5.1 (11,605)<br>CVD events (485)<br>Chronic Heart Disease events (302)<br>Cerebrovascular events (225)                        |
| 19                                                                                               | Tivesten, 2014[34]         | Sweden    | MrOS                    | 2,416           | 2001-04         | 75.4 (3.2)                        | 15.7 (6)                      | Md=5.2 (12,070; CHD)<br>Cerebrovascular Disease (225; CBD) (12,137; CBD)                                                         |
| 20                                                                                               | Kische, 2017[35]           | Germany   | SHIP                    | 1,962           | 1997-01         | 49.5 (16.3)                       | 15.6 (6.1)                    | Tot=10<br>Change in cognitive status                                                                                             |
| <b>Decision = "Maybe". Item selected based on additional information</b>                         |                            |           |                         |                 |                 |                                   |                               |                                                                                                                                  |
| 21                                                                                               | LeBlanc, 2010[36]          | USA       | MrOS                    | 1,602           | NR              | NR                                | NR                            | Mn=4.5†† (26,977)<br>Cognitive function (and change in)<br>Cognitive decline                                                     |
| 22*                                                                                              | Sueoka, 2010[14]           | USA       | MrOS                    | 697             | 2000-05         | 72 (5.5)                          | 14.5 (5.1)                    | Av=3.9†† (6,247)<br>Coronary Heart Disease events (100)                                                                          |
| <b>Other. Additional studies selected based on information external to the systematic review</b> |                            |           |                         |                 |                 |                                   |                               |                                                                                                                                  |
|                                                                                                  | No articles were selected. | USA       | FHS                     | 3,352[12]       | 1998-05         | 59.6 (9.1)[12]<br>49.4 (13.8)[11] | 20.7 (8.0)[12]                | Tot=10 (for Atrial Fibrillation)[37]<br>Cardiovascular outcomes[37, 38]<br>Deaths[37]<br>Cause-specific deaths[38]<br>Cancer[39] |
|                                                                                                  | No articles were selected. | Australia | MAILES                  | 1,632[40]       | 2002-06[8]      | 54.1 (11.4)[40]                   | 17.3 (5.7)[40]                | Md=4.95;<br>IQR=4.35-5.00[40]<br>(12,686)<br>CVD events<br>Deaths (99)[8]<br>Cause-specific deaths[8]                            |

§ Study name abbreviations: 'ARIC'= Atherosclerosis Risk in Communities; 'BHS'=Busselton Health Study; 'CHAMP'=The Concord Health and Ageing in Men Project; 'CHS'= Cardiovascular Health Study; 'FHS'= the Framingham Heart Study; 'HIMS'=The Health In Men Study; 'EMAS'=European Male Ageing Study; 'MAILES'= The Men Androgen Inflammation Lifestyle Environment and Stress study; 'MrOS Sweden'=The MrOS Osteoporotic Fractures in Men study in Sweden; 'MrOS USA' = The MrOS Osteoporotic Fractures in Men study USA; 'SHIP'=Study of Health in Pomerania SHIP.

§§ = UK, Italy, Belgium, Poland, Sweden, Spain, Hungary, Estonia



*Supplementary Material. Systematic review: associations of testosterone with men's health.*

¶ 'Md'=median; 'Mn'=mean; 'Av'=average; 'Tot'=total follow-up for the cohort (i.e., maximum, rounded down to nearest whole year); 'IQR'=interquartile range. Unless provided in text, person-years was calculated by multiplying the median, mean, or average length of follow-up by the total number of adult male participants.

\* = Note that this is a published conference abstract so is not technically a "Full Text" item.

\*\* = Baseline statistics reported for whole cohort; 'NR' = statistics not reported for whole cohort; Means and standard deviations calculated by firstly transforming into standard units (for T: nmol/L) and then, where required, transforming from quartile statistics using the Box-Cox method of McGrath et al.[41]

\*\*\* = First number is for individuals without CVD at baseline.

† = Total follow-up exceeded 5 years, from baseline visit (2001-04) to end of mortality data collection (March 1, 2008).

†† = Note that since there was no published follow-up estimate exceeding 5 years (a requirement for selection) and it was not clear, based on the article information alone, whether the total follow-up was at least 5 years, these items were initially classified as "Maybe". The length of follow-up for collection of AIMS outcome data was determined to be satisfactory from subsequent correspondence with MrOS USA researchers.

## Supplementary Material. Systematic review: associations of testosterone with men's health.

Supplementary table 7. Exposure levels, outcome assessment, covariates.\*

| Study | Article             | Longitudinal measure of association                                                               | Exposure (testosterone)                                                                                               | Outcome ascertainment                                                                                                                                                                                                                        | Covariates                                                                                                                                                                                                                    |
|-------|---------------------|---------------------------------------------------------------------------------------------------|-----------------------------------------------------------------------------------------------------------------------|----------------------------------------------------------------------------------------------------------------------------------------------------------------------------------------------------------------------------------------------|-------------------------------------------------------------------------------------------------------------------------------------------------------------------------------------------------------------------------------|
| ARIC  | Srinath, 2015[16]   | HR                                                                                                | T quartiles                                                                                                           | CVD events and deaths identified by annual questionnaires and continuous surveillance, independent from hospital admissions data (ICD codes). Cause of death from death certificates.                                                        | Age, race/centre, BMI, waist circumference, smoking status, diabetes mellitus, hypertension, LDL, HDL.                                                                                                                        |
|       | Srinath, 2016[17]   | HR                                                                                                | T tertiles                                                                                                            | Definite or probable stroke events identified from hospital admissions, annual phone calls, study examinations adjudicated by a physician, with secondary physician adjudication if it disagreed with a computer algorithm.                  | Age, race, centre, BMI, waist circumference, smoking status, diabetes mellitus, hypertension, LDL, HDL.                                                                                                                       |
| BHS   | Chan, 2016[18]      | HR                                                                                                | T quartiles (results not shown), Continuous T.                                                                        | Linked hospital admissions and deaths records (ICD codes)                                                                                                                                                                                    | Age, smoking, vigorous exercise, alcohol, BMI, diabetes, CVD, COPD, non-skin cancer, systolic blood pressure, hypertension, lipid lowering therapy, cholesterol, HDL, triglycerides, C-reactive protein, creatinine           |
|       | Chasland, 2017[19]  | HR                                                                                                | Categories: Low (L) v High (H) T, physical activity(PA) LT+LPA, LT+HPA, HT+LPA, HT+HPA                                | Linked hospital admissions and deaths records (ICD codes)                                                                                                                                                                                    | Age, prevalent CVD, smoking, waist circumference, cholesterol, HDL, lipids medication, diabetes, systolic blood pressure, hypertension medication                                                                             |
|       | Chan, 2018[20]      | HR                                                                                                | T quartiles, Continuous T.                                                                                            | Linked cancer and death registry records (ICD codes)                                                                                                                                                                                         | Age, marital status, occupation, smoking, alcohol consumption, leisure time physical activity, BMI, diabetes                                                                                                                  |
| CHAMP | Hsu, 2015[21]       | Slope estimate (change in MMSE on baseline hormone level or longitudinal change in hormone level) | Continuous T, cFT                                                                                                     | Clinic assessment: MMSE, Informant Questionnaire on Cognitive Decline as initial screen, followed by clinical assessment to diagnosis categories: normal cognition, MCI, dementia.<br>During follow-up: A decline in MMSE by $\geq 3$ points | Age, BMI, smoking status, years of education, depression score (GDS)                                                                                                                                                          |
|       | Hsu, 2016[22]       | RR                                                                                                | Continuous T, cFT                                                                                                     | Deaths identified from 4-monthly phone calls or deaths registry. Cause of death identified on death certificates independently by 2 medical practitioners.                                                                                   | Age, BMI, smoking status, comorbidity score                                                                                                                                                                                   |
|       | Hsu, 2018[23]       | HR, RR (Death outcomes); Slope estimates (MMSE, SF-12 Mental)                                     | Categories: Low (<20 <sup>th</sup> centile) v Normal T combinations with Low (<20 <sup>th</sup> centile) v Normal cFT | Cause of death identified on death certificates independently by 2 medical practitioners.                                                                                                                                                    | Age, BMI, smoking status, comorbidity score                                                                                                                                                                                   |
| CHS   | Rosenberg, 2018[24] | HR                                                                                                | Continuous T and cFT, T and cFT quintiles                                                                             | Independently verified from ECGs taken annually for participants and from hospital discharge diagnoses                                                                                                                                       | Age (stratified), race, education, income, clinic, smoking status, diabetes mellitus, BMI, loop diuretics, height, hypertension, depressed left ventricular ejection fraction, kidney function, systolic blood pressure, SHBG |

## Supplementary Material. Systematic review: associations of testosterone with men's health.

| Study       | Article            | Longitudinal measure of association                 | Exposure (testosterone)                                            | Outcome ascertainment                                                                                                                                                                                                      | Covariates                                                                                                                                                                                      |
|-------------|--------------------|-----------------------------------------------------|--------------------------------------------------------------------|----------------------------------------------------------------------------------------------------------------------------------------------------------------------------------------------------------------------------|-------------------------------------------------------------------------------------------------------------------------------------------------------------------------------------------------|
|             | Shores, 2014a[25]  | HR                                                  | Continuous T, cFT (linear & non-linear), T categories              | Medicare data, hospital records, imaging studies, autopsy results, death certificates, physician interviews data used for adjudications by committee, which included a neurologist.                                        | Age, systolic blood pressure, anti-hypertensive medications, atrial fibrillation, diabetes, smoking, lipid-lowering drugs, HDL, cholesterol, creatinine, fasting glucose, diabetes medications. |
|             | Shores, 2014b[26]  | HR                                                  | Continuous T, cFT (linear or non-linear) categories: Q1, Q2-4      | Medicare data, hospital records, imaging studies, autopsy results, death certificates, physician interviews data used for adjudications by committee, which included a neurologist.                                        | Age, race, site, smoking status, alcohol consumption, hypertensive use, HDL, BMI, waist circumference, diabetes, SHBG.                                                                          |
| EMAS        | Lee, 2013[27]      | N/A                                                 | No modelling of longitudinal outcomes reported                     | MI, heart failure, other heart conditions, cancers, stroke identified from postal questionnaire, MMSE for participants ≥65 yr old from clinic assessments<br>Variable methods for data capture + validation among centres. | No modelling of longitudinal outcomes reported                                                                                                                                                  |
|             | Pye, 2014[28]      | HR                                                  | T, cFT categories: quintiles, low v eugonadal T, LOH status.       | Deaths identified from follow-up postal questionnaire or enquiry if no reply received, with 89% of deaths verified from death certificates, death registers, or medical/hospital records.                                  | Age, site, BMI, smoking status, general health.                                                                                                                                                 |
| HIMS        | Chan, 2017[29]     | SHR                                                 | Continuous T, cFT.                                                 | Linked hospital admissions, death and cancer registry records (ICD, ICD-O-3 codes).                                                                                                                                        | Age, BMI, smoking status, physical activity, alcohol consumption, diabetes mellitus, HDL, triglycerides, prior cancer diagnosis.                                                                |
|             | Ford, 2018[30]     | HR                                                  | Continuous T, cFT Quartile categories of T, cFT                    | Linked data (ICD codes) from inpatient and outpatient mental health services, hospital admissions, community aged care services, cancer and death registries.                                                              | Age, baseline cognitive function, depression, BMI, hypertension, CVD, plasma homocysteine.                                                                                                      |
|             | Yeap, 2014[31]     | HR                                                  | T, cFT as quartile categories                                      | Linked hospital admissions, death and cancer registry records (ICD codes).                                                                                                                                                 | Age, education, smoking status, BMI, waist to hip ratio, hypertension, dyslipidemia, diabetes, creatinine, prior cancer or existing CVD. Also SHBG for models with T.                           |
| MrOS Europe | Ohlsson, 2010[32]  | HR (in relation to DHEA, DHEA-S)                    | No: T modelled as a covariate only                                 | Linked data (death and hospital discharge registries), death certificates.                                                                                                                                                 | Age, site, BMI, C-reactive protein, ApoB/A1, smoking status, diabetes, hypertension, prior CVD, prior cancer, low testosterone (in lowest quartile), low estradiol                              |
|             | Ohlsson, 2011[33]  | HR                                                  | T, cFT as quartile categories, T as binary categories.             | Linked data (death and hospital discharge registries), death certificates.                                                                                                                                                 | Age, morning sample, site, BMI, ApoB/A1, physical activity, smoking status, diabetes, hypertension                                                                                              |
|             | Tivesten, 2014[34] | HR (in relation to DHEA, DHEA-S)                    | No: T modelled as a covariate only                                 | Linked data (death and hospital discharge registries), death certificates.                                                                                                                                                 | Age, morning sample, site, BMI, ApoB/A1, C-reactive protein, estradiol, testosterone (i.e., continuous T), SHBG, eGFR, smoking status, diabetes, hypertension.                                  |
| SHIP        | Kische, 2017[35]   | Slope estimate (change in MMSE on baseline hormone) | T, cFT as continuous and as 10-year age group quartile categories. | MMSE score.                                                                                                                                                                                                                | Age, BMI, smoking status, alcohol consumption, physical activity, hypertension, occupational status, education level, civil status, baseline MMSE.                                              |

## Supplementary Material. Systematic review: associations of testosterone with men's health.

| Study    | Article                       | Longitudinal measure of association                        | Exposure (testosterone)                                 | Outcome ascertainment                                                                                                                                                                                                                                                                                                                                                                                                                                           | Covariates                                                                                                                                                                            |
|----------|-------------------------------|------------------------------------------------------------|---------------------------------------------------------|-----------------------------------------------------------------------------------------------------------------------------------------------------------------------------------------------------------------------------------------------------------------------------------------------------------------------------------------------------------------------------------------------------------------------------------------------------------------|---------------------------------------------------------------------------------------------------------------------------------------------------------------------------------------|
| MrOS USA | LeBlanc, 2010[36]             | Change in mean score<br>RR of clinically important decline | cFT quartiles and continuous cFT and T (data not shown) | Cognitive tests at the baseline and follow-up visit from Part B of the Trail Making Test (Trails B) and the Modified Mental State Examination (3MS).<br>Calculated from pre-defined drop in scores.                                                                                                                                                                                                                                                             | Age group, education level, race, general health, alcohol consumption, clinic, physical and mental health, physical activity, medications used at baseline, other sex steroids, SHBG. |
|          | Sueoka, 2010[14]              | HR                                                         | T quartiles                                             | CHD events identified from 3-monthly contacts with participants. Incident events were reviewed and adjudicated by cardiologist using clinical records.                                                                                                                                                                                                                                                                                                          | Age, clinic, BMI, blood pressure, lipid levels, smoking, hypertension, diabetes, use of lipid-lowering agents                                                                         |
| FHS      | N/A – no items were selected. | N/A                                                        | N/A                                                     | AF measured and adjudicated by cardiologists. Mortality data from death certificates, hospital or institutional records, obituaries, or direct notification[37]<br>Medical records of CVD events reviewed by panel of experienced investigators. A heart study neurologist examined most participants with suspected stroke[38]<br>Medical records of cancer diagnoses reviewed by two independent reviewers, with majority confirmed by pathology reports.[39] | N/A                                                                                                                                                                                   |
| MAILES   | N/A – no items selected.      | N/A                                                        | N/A                                                     | Self-reported and clinical follow-up data, death registry (linked data)[8]                                                                                                                                                                                                                                                                                                                                                                                      | N/A                                                                                                                                                                                   |

\* ApoB/A1 = apolipoprotein-B to apolipoprotein-A1 ratio; BMI = body mass index; cFT = calculated free testosterone; CHD = coronary heart disease; COPD = chronic obstructive pulmonary disease; CVD = cardiovascular disease; DHEA = dehydroepiandrosterone; DHEA-S = DHEA sulfate; ECG = electrocardiogram; eGFR = estimated glomerular filtration rate; GDS = Geriatric Depression Scale; HDL = high-density lipoprotein; HR = hazard ratio; ICD = International Classification of Diseases; ICD-O-3 = International Classification of Diseases for Oncology; LDL = low-density lipoprotein; LOH = late-onset hypogonadism; MCI = mild cognitive impairment; MMSE = mini-mental state examination; N/A = not applicable; Q1=quartile 1; Q2-4=quartiles 2 to 4 combined; RR = relative risk; SF-12 = The Short Form (12) Health Survey; SHBG = sex hormone binding globulin; SHR = subhazard ratio, as estimated from competing-risks regression; T = total endogenous testosterone.

## Supplementary Material. Systematic review: associations of testosterone with men's health.

Supplementary table 8. Newcastle-Ottawa Quality Assessment Scale for Cohort Studies: selected articles.

| Article                                                    | Study    | Selection<br>(4 stars) | Comparability<br>(2 stars) | Outcome<br>(3 stars) | Notes on Selection                                         | Notes on Outcome                                             |
|------------------------------------------------------------|----------|------------------------|----------------------------|----------------------|------------------------------------------------------------|--------------------------------------------------------------|
| Srinath 2015[16]                                           | ARIC     | ****                   | **                         | **                   |                                                            | Losses to f/u not mentioned; linked data <sup>b</sup>        |
| Srinath 2016[17]                                           | ARIC     | ****                   | **                         | **                   |                                                            | Losses to f/u not mentioned; linked data <sup>b</sup>        |
| Chan 2016[18]                                              | BHS      | ****                   | **                         | **                   |                                                            | Losses to f/u not mentioned; linked data <sup>b</sup>        |
| Chasland 2017[19]                                          | BHS      | ***                    | **                         | **                   | Prevalent cases not excluded <sup>a</sup>                  | Losses to f/u not mentioned; linked data <sup>b</sup>        |
| Chan 2018[20]                                              | BHS      | ****                   | **                         | **                   |                                                            | Losses to f/u not mentioned; linked data <sup>b</sup>        |
| Hsu 2015[21]                                               | CHAMP    | ****                   | **                         | ***                  |                                                            |                                                              |
| Hsu 2016[22]                                               | CHAMP    | ***                    | **                         | ***                  | Prevalent cases not excluded <sup>c</sup>                  |                                                              |
| Hsu 2018[23]                                               | CHAMP    | ***                    | **                         | ***                  | Prevalent cases not excluded <sup>c</sup>                  |                                                              |
| Rosenberg 2018[24]                                         | CHS      | ****                   | **                         | **                   |                                                            | Losses to f/u not mentioned; linked data <sup>d</sup>        |
| Shores 2014a[25]                                           | CHS      | ****                   | **                         | **                   |                                                            | Losses to f/u not mentioned; linked data <sup>d</sup>        |
| Shores 2014b[26]                                           | CHS      | ****                   | **                         | **                   |                                                            | Losses to f/u not mentioned; linked data <sup>d</sup>        |
| Lee 2013[27]                                               | EMAS     | NA                     | NA                         | NA                   | No modelling of longitudinal outcomes reported             |                                                              |
| Pye 2014[28]                                               | EMAS     | ***                    | **                         | ***                  | Prevalent cases not excluded <sup>a</sup>                  |                                                              |
| Chan 2017[29]                                              | HIMS     | ****                   | **                         | **                   |                                                            | Losses to f/u not mentioned; linked data <sup>b</sup>        |
| Ford 2018[30]                                              | HIMS     | ****                   | **                         | **                   |                                                            | Losses to f/u not mentioned; linked data <sup>b</sup>        |
| Yeap 2014[31]                                              | HIMS     | ***                    | **                         | **                   | Prevalent cases not excluded <sup>a</sup>                  | Losses to f/u not mentioned; linked data <sup>b</sup>        |
| Ohlsson 2010[32]                                           | MrOS Sw. | NA                     | NA                         | NA                   | Testosterone was not the exposure variable in this article |                                                              |
| Ohlsson 2011[33]                                           | MrOS Sw. | ****                   | **                         | ***                  |                                                            |                                                              |
| Tivesten 2014[34]                                          | MrOS Sw. | NA                     | NA                         | NA                   | Testosterone was not the exposure variable in this article |                                                              |
| Kische 2017[35]                                            | SHIP     | ***                    | **                         | ***                  | Prevalent cases not excluded <sup>c</sup>                  |                                                              |
| LeBlanc 2010[36]                                           | MrOS USA | ****                   | **                         | *                    |                                                            | Bias from loss to f/u; F/u OK: additional steps <sup>f</sup> |
| Sueoka 2010[14]                                            | MrOS USA | ***                    | **                         | *                    | Prevalent cases not excluded <sup>a</sup>                  | F/u OK: additional steps <sup>f</sup>                        |
| <b>Additional item not selected but included in DR-MA:</b> |          |                        |                            |                      |                                                            |                                                              |
| Yeap 2014b[13]                                             | HIMS     | ***                    | **                         | **                   | Prevalent cases not excluded <sup>a</sup>                  | Losses to f/u not mentioned; linked data <sup>b</sup>        |

'NA' = Not applicable (see Notes); 'f/u' = follow-up (of incident events); 'DR-MA' = dose-response meta-analyses of published estimates.

<sup>a</sup> = The influence of prevalent cases was statistically adjusted by including prevalent status as a model predictor.

<sup>b</sup> = Follow-up of cases was assumed to be almost complete because analyses were of linked administrative data.

<sup>c</sup> = The influence of prevalent cases was statistically adjusted by incorporating into a comorbidity status model predictor.

<sup>d</sup> = Follow-up of cases was assumed to be almost complete because analyses were of linked administrative data (with expert adjudications).

<sup>e</sup> = Outcome was change in cognition score, with baseline score (prevalent status) included as a model predictor.

<sup>f</sup> = Total length of follow-up period was not reported but determined to be satisfactory from correspondence with MrOS USA researchers.

## Supplementary Material. Systematic review: associations of testosterone with men's health.

Supplementary table 9. Extracted hazard ratio data for dose-response meta-analyses (DR-MAs).\*

| Article          | Study | Outcome             | Testosterone   | Units  | HR   | 95% CI      | Notes                                   |
|------------------|-------|---------------------|----------------|--------|------|-------------|-----------------------------------------|
| Chan 2016[18]    | BHS   | All-cause mortality | <10.20         | nmol/L | ref. |             |                                         |
| Chan 2016        | BHS   | All-cause mortality | 10.20 - <13.04 | nmol/L | 0.84 | (0.62-1.14) |                                         |
| Chan 2016        | BHS   | All-cause mortality | 13.04 - <16.58 | nmol/L | 0.86 | (0.62-1.19) |                                         |
| Chan 2016        | BHS   | All-cause mortality | ≥16.58         | nmol/L | 0.9  | (0.62-1.3)  |                                         |
| Pye 2014[28]     | EMAS  | All-cause mortality | <11.65         | nmol/L | 1.1  | (0.6-1.8)   |                                         |
| Pye 2014         | EMAS  | All-cause mortality | 11.65-14.61    | nmol/L | 0.7  | (0.4-1.3)   |                                         |
| Pye 2014         | EMAS  | All-cause mortality | 14.61-17.28    | nmol/L | 0.7  | (0.4-1.3)   |                                         |
| Pye 2014         | EMAS  | All-cause mortality | 17.28-21.20    | nmol/L | 1.2  | (0.7-2)     |                                         |
| Pye 2014         | EMAS  | All-cause mortality | >21.20         | nmol/L | ref. |             |                                         |
| Srinath 2015[16] | ARIC  | All-cause mortality | ≤288.4         | ng/dL  | 0.96 | (0.7-1.34)  |                                         |
| Srinath 2015     | ARIC  | All-cause mortality | 288.5-377.6    | ng/dL  | 0.99 | (0.72-1.35) |                                         |
| Srinath 2015     | ARIC  | All-cause mortality | 377.7-480.1    | ng/dL  | 1    | (0.74-1.35) |                                         |
| Srinath 2015     | ARIC  | All-cause mortality | ≥480.2         | ng/dL  | ref. |             |                                         |
| Shores 2014b[26] | CHS   | All-cause mortality | <278           | ng/dL  | 1.06 | (0.88-1.29) |                                         |
| Shores 2014b     | CHS   | All-cause mortality | ≥278           | ng/dL  | ref. |             |                                         |
| Yeap 2014b[13]   | HIMS  | All-cause mortality | 0.25-9.82      | nmol/L | ref. |             | Fully-adjusted model + SHBG             |
| Yeap 2014b       | HIMS  | All-cause mortality | 9.82-12.53     | nmol/L | 0.81 | (0.68-0.98) |                                         |
| Yeap 2014b       | HIMS  | All-cause mortality | 12.56-15.75    | nmol/L | 0.75 | (0.61-0.92) |                                         |
| Yeap 2014b       | HIMS  | All-cause mortality | 15.79-46.50    | nmol/L | 0.77 | (0.61-0.97) |                                         |
| Yeap 2014b       | HIMS  | All-cause mortality | 0.25-9.82      | nmol/L | ref. |             | Fully-adjusted model + LH               |
| Yeap 2014b       | HIMS  | All-cause mortality | 9.82-12.53     | nmol/L | 0.84 | (0.7-1.01)  |                                         |
| Yeap 2014b       | HIMS  | All-cause mortality | 12.56-15.75    | nmol/L | 0.81 | (0.67-0.97) |                                         |
| Yeap 2014b       | HIMS  | All-cause mortality | 15.79-46.50    | nmol/L | 0.89 | (0.73-1.07) |                                         |
| Hsu 2016[22]     | CHAMP | All-cause mortality |                | ng/mL  | 1.17 | (1.03-1.32) | Per SD decrease in T. RR estimate used. |
| Chan 2016        | BHS   | CVD mortality       | <10.20         | nmol/L | ref. |             |                                         |

## Supplementary Material. Systematic review: associations of testosterone with men's health.

| Article           | Study | Outcome       | Testosterone   | Units  | HR   | 95% CI      | Notes                                                    |
|-------------------|-------|---------------|----------------|--------|------|-------------|----------------------------------------------------------|
| Chan 2016         | BHS   | CVD mortality | 10.20 - <13.04 | nmol/L | 1.12 | (0.7-1.78)  |                                                          |
| Chan 2016         | BHS   | CVD mortality | 13.04 - <16.58 | nmol/L | 1.39 | (0.86-2.25) |                                                          |
| Chan 2016         | BHS   | CVD mortality | ≥16.58         | nmol/L | 1.25 | (0.69-2.25) |                                                          |
| Chasland 2017[19] | BHS   | CVD mortality | <13.1          | nmol/L | ref. |             | Total PA, "Low" PA, NS PA x T: these estimates were used |
|                   | BHS   | CVD mortality | ≥13.1          | nmol/L | 1.25 | (0.77-2.03) |                                                          |
| Chasland 2017     | BHS   | CVD mortality | <13.1          | nmol/L | 0.69 | (0.4-1.2)   | Total PA, "High" PA, NS PA x T                           |
| Chasland 2017     | BHS   | CVD mortality | ≥13.1          | nmol/L | 0.8  | (0.48-1.35) |                                                          |
| Pye 2014          | EMAS  | CVD mortality | <11.65         | nmol/L | 1    | (0.4-2.2)   |                                                          |
| Pye 2014          | EMAS  | CVD mortality | 11.65-14.61    | nmol/L | 0.5  | (0.2-1.4)   |                                                          |
| Pye 2014          | EMAS  | CVD mortality | 14.61-17.28    | nmol/L | 0.4  | (0.2-1.2)   |                                                          |
| Pye 2014          | EMAS  | CVD mortality | 17.28-21.20    | nmol/L | 1.1  | (0.5-2.4)   |                                                          |
| Pye 2014          | EMAS  | CVD mortality | >21.20         | nmol/L | ref. |             |                                                          |
| Srinath 2015      | ARIC  | CVD mortality | ≤288.4         | ng/dL  | 1.36 | (0.45-4.08) |                                                          |
| Srinath 2015      | ARIC  | CVD mortality | 288.5-377.6    | ng/dL  | 1.26 | (0.73-3.7)  |                                                          |
| Srinath 2015      | ARIC  | CVD mortality | 377.7-480.1    | ng/dL  | 0.57 | (0.16-1.99) |                                                          |
| Srinath 2015      | ARIC  | CVD mortality | ≥480.2         | ng/dL  | ref. |             |                                                          |
| Shores 2014b      | CHS   | CVD mortality | <278           | ng/dL  | 1.28 | (0.94-1.75) |                                                          |
| Shores 2014b      | CHS   | CVD mortality | ≥278           | ng/dL  | ref. |             |                                                          |
| Yeap 2014b        | HIMS  | CVD mortality | 0.25-9.82      | nmol/L | ref. |             |                                                          |
| Yeap 2014b        | HIMS  | CVD mortality | 9.82-12.53     | nmol/L | 0.82 | (0.61-1.11) |                                                          |
| Yeap 2014b        | HIMS  | CVD mortality | 12.56-15.75    | nmol/L | 0.79 | (0.58-1.09) |                                                          |
| Yeap 2014b        | HIMS  | CVD mortality | 15.79-46.50    | nmol/L | 0.79 | (0.56-1.11) |                                                          |
| Hsu 2016          | CHAMP | CVD mortality |                | ng/mL  | 1.11 | (0.93-1.32) | Per SD decrease in T. RR estimate used                   |
| Srinath 2016[17]  | ARIC  | Stroke / CBD  | ≤317.7         | ng/dL  | 1.47 | (0.83-2.61) |                                                          |
|                   | ARIC  | Stroke / CBD  | 317.8-441.2    | ng/dL  | ref. |             |                                                          |
| Srinath 2016      | ARIC  | Stroke / CBD  | ≥441.3         | ng/dL  | 1.15 | (0.62-2.14) |                                                          |
| Shores 2014a[25]  | CHS   | Stroke / CBD  | <200           | ng/dL  | 1.46 | (0.77-2.75) |                                                          |
| Shores 2014a      | CHS   | Stroke / CBD  | 200-400        | ng/dL  | 0.9  | (0.56-1.45) |                                                          |

## Supplementary Material. Systematic review: associations of testosterone with men's health.

| Article             | Study    | Outcome      | Testosterone | Units  | HR   | 95% CI      | Notes                                                    |
|---------------------|----------|--------------|--------------|--------|------|-------------|----------------------------------------------------------|
| Shores 2014a        | CHS      | Stroke / CBD | 400-600      | ng/dL  | ref. |             |                                                          |
| Shores 2014a        | CHS      | Stroke / CBD | 600-800      | ng/dL  | 1.73 | (0.88-3.39) |                                                          |
| Shores 2014a        | CHS      | Stroke / CBD | >800         | ng/dL  | 1.69 | (0.51-5.60) |                                                          |
| Yeap 2014[31]       | HIMS     | Stroke / CBD | 0.25-9.82    | nmol/L | ref. |             |                                                          |
| Yeap 2014           | HIMS     | Stroke / CBD | 9.82-12.53   | nmol/L | 0.8  | (0.59-1.09) |                                                          |
| Yeap 2014           | HIMS     | Stroke / CBD | 12.56-15.75  | nmol/L | 0.72 | (0.52-0.99) |                                                          |
| Yeap 2014           | HIMS     | Stroke / CBD | 15.79-46.5   | nmol/L | 0.56 | (0.39-0.81) |                                                          |
| Ohlsson<br>2011[33] | MrOS(Sw) | Stroke / CBD | ≤340         | ng/dL  | ref. |             |                                                          |
| Ohlsson 2011        | MrOS(Sw) | Stroke / CBD | 341-438      | ng/dL  | ref. |             |                                                          |
| Ohlsson 2011        | MrOS(Sw) | Stroke / CBD | 439-549      | ng/dL  | ref. |             | Quartile 4 vs. quartiles 1 to 3 of testosterone          |
| Ohlsson 2011        | MrOS(Sw) | Stroke / CBD | ≥550         | ng/dL  | 0.76 | (0.55-1.05) |                                                          |
| Ohlsson 2011        | MrOS(Sw) | CVD          | ≤340         | ng/dL  | ref. |             |                                                          |
| Ohlsson 2011        | MrOS(Sw) | CVD          | 341-438      | ng/dL  | 1.02 | (0.80-1.30) |                                                          |
| Ohlsson 2011        | MrOS(Sw) | CVD          | 439-549      | ng/dL  | 0.96 | (0.75-1.23) |                                                          |
| Ohlsson 2011        | MrOS(Sw) | CVD          | ≥550         | ng/dL  | 0.71 | (0.54-0.93) |                                                          |
| Chan 2016           | BHS      | CVD          |              | nmol/L | 1.03 | (0.92-1.15) | Per SD increase in T                                     |
| Chasland 2017       | BHS      | CVD          | <13.1        | nmol/L | ref. |             | Total PA, "Low" PA, NS PA x T: these estimates were used |
| Chasland 2017       | BHS      | CVD          | ≥13.1        | nmol/L | 1.09 | (0.83-1.44) |                                                          |
| Chasland 2017       | BHS      | CVD          | <13.1        | nmol/L | 0.93 | (0.70-1.23) | Total PA, "High" PA, NS PA x T                           |
| Chasland 2017       | BHS      | CVD          | ≥13.1        | nmol/L | 1.04 | (0.78-1.38) |                                                          |
| Shores 2014b        | CHS      | CVD          | <278         | ng/dL  | 1.11 | (0.87-1.43) |                                                          |
| Shores 2014b        | CHS      | CVD          | ≥278         | ng/dL  | ref. |             |                                                          |
| Yeap 2014           | HIMS     | CVD: MI      | 0.25-9.82    | nmol/L | ref. |             |                                                          |
| Yeap 2014           | HIMS     | CVD: MI      | 9.82-12.53   | nmol/L | 1.07 | (0.79-1.44) |                                                          |
| Yeap 2014           | HIMS     | CVD: MI      | 12.56-15.75  | nmol/L | 1.03 | (0.76-1.41) |                                                          |
| Yeap 2014           | HIMS     | CVD: MI      | 15.79-46.5   | nmol/L | 0.92 | (0.66-1.28) |                                                          |
| Srinath 2015        | ARIC     | CVD: HF      | ≤288.4       | ng/dL  | 0.77 | (0.46-1.29) |                                                          |
| Srinath 2015        | ARIC     | CVD: HF      | 288.5-377.6  | ng/dL  | 0.72 | (0.43-1.21) |                                                          |



## Supplementary Material. Systematic review: associations of testosterone with men's health.

| Article       | Study | Outcome            | Testosterone               | Units  | HR   | 95% CI      | Notes                                   |
|---------------|-------|--------------------|----------------------------|--------|------|-------------|-----------------------------------------|
| Srinath 2015  | ARIC  | CVD: HF            | 377.7-480.1                | ng/dL  | 0.87 | (0.53-1.42) |                                         |
| Srinath 2015  | ARIC  | CVD: HF            | ≥480.2                     | ng/dL  | ref. |             |                                         |
| Chan 2018[20] | BHS   | Cancer             | <10.17                     | nmol/L | ref. |             |                                         |
| Chan 2018     | BHS   | Cancer             | 10.17-<12.95               | nmol/L | 0.72 | (0.53-0.99) |                                         |
| Chan 2018     | BHS   | Cancer             | 12.95-<16.49               | nmol/L | 0.71 | (0.51-0.98) |                                         |
| Chan 2018     | BHS   | Cancer             | ≥16.49                     | nmol/L | 0.81 | (0.57-1.14) |                                         |
| Chan 2018     | BHS   | Cancer: Prostate   | <10.17                     | nmol/L | ref. |             |                                         |
| Chan 2018     | BHS   | Cancer: Prostate   | 10.17-<12.95               | nmol/L | 0.62 | (0.37-1.03) |                                         |
| Chan 2018     | BHS   | Cancer: Prostate   | 12.95-<16.49               | nmol/L | 0.75 | (0.46-1.23) |                                         |
| Chan 2018     | BHS   | Cancer: Prostate   | ≥16.49                     | nmol/L | 0.58 | (0.33-1.01) |                                         |
| Chan 2018     | BHS   | Cancer: Colorectal |                            | nmol/L | 1.04 | (0.76-1.42) | Per SD increase in T                    |
| Chan 2018     | BHS   | Cancer: Lung       |                            | nmol/L | 0.65 | (0.39-1.09) | Per SD increase in T                    |
| Chan 2017[29] | HIMS  | Cancer: Prostate   |                            | nmol/L | 1.00 | (0.90-1.12) | Per SD increase in T.                   |
| Chan 2017     | HIMS  | Cancer: Colorectal |                            | nmol/L | 0.96 | (0.80-1.15) | Per SD increase in T                    |
| Chan 2017     | HIMS  | Cancer: Lung       |                            | nmol/L | 1.30 | (1.06-1.60) | Per SD increase in T                    |
| Hsu 2016      | CHAMP | Cancer mortality   |                            | ng/mL  | 1.30 | (1.02-1.65) | Per SD decrease in T. RR estimate used. |
| Ford 2018[30] | HIMS  | Dementia           | Not reported               | nmol/L | 1.39 | (1.04-1.85) |                                         |
| Ford 2018     | HIMS  | Dementia           |                            |        | 1.31 | (1.00-1.73) |                                         |
| Ford 2018     | HIMS  | Dementia           |                            |        | 1.23 | (0.93-1.61) |                                         |
| Ford 2018     | HIMS  | Dementia           |                            |        | ref. |             |                                         |
| Ford 2018     | HIMS  | Dementia           | SD for cohort not reported | nmol/L | 1.11 | (1.01-1.21) | Per SD decrease in T                    |

\* = Estimates were also reported for all-cause and CVD mortality mortality for the CHAMP study in another of the selected articles,[23] but were not used because they were reported for combinations of free testosterone and total testosterone, and so were not comparable to the above published estimates.

CBD = cerebrovascular disease; CVD = cardiovascular disease; HF = heart failure; LH = luteinising hormone; MI = myocardial infarction; NS = non-significant result at *a priori* selected threshold for test; PA = physical activity level; ref. = referent level; RR = relative risk; SD = standard deviation; SHBG = sex hormone-binding globulin; T = endogenous total testosterone concentration.

## Supplementary Material. Systematic review: associations of testosterone with men's health.

Supplementary table 10. Published estimates for selected studies investigating associations of total testosterone with cognitive status or decline.\*

| Article          | Study   | Outcome             | Testosterone | Units  | Effect size parameter | Estimate | 95% CI     | p value     | Notes                                                                                      |
|------------------|---------|---------------------|--------------|--------|-----------------------|----------|------------|-------------|--------------------------------------------------------------------------------------------|
| Hsu 2015[21]     | CHAMP   | Cognitive change    | Baseline     | ng/mL  | Slope: Per            | 0.012    | NR         | 0.7         | Longitudinal change in MMSE score                                                          |
| Hsu 2015         | CHAMP   | Cognitive change    | Longitudinal | ng/mL  | unit decline          | 0.067    | NR         | 0.03        | Longitudinal change in MMSE score                                                          |
| Hsu 2015         | CHAMP   | Cognitive decline   | Baseline     | ng/mL  | Odds Ratio            | NR       | NR         | NR          | Longitudinal decline in MMSE $\geq$ 3 points. Non-significant association (data not shown) |
| Hsu 2018[23]     | CHAMP   | Baseline cognition  | Baseline NN  | nmol/L | Slope                 | 0        | 0          | NR          | MMSE** at baseline                                                                         |
| Hsu 2018         | CHAMP   | Baseline cognition  | Baseline NL  | nmol/L | Slope                 | 0.1      | -0.8-1.1   | NR          | MMSE at baseline                                                                           |
| Hsu 2018         | CHAMP   | Baseline cognition  | Baseline LN  | nmol/L | Slope                 | 0.02     | -1.0-1.02  | NR          | MMSE at baseline                                                                           |
| Hsu 2018         | CHAMP   | Baseline cognition  | Baseline LL  | nmol/L | Slope                 | 0.8      | -0.5-0.4   | NR          | MMSE at baseline                                                                           |
| Hsu 2018         | CHAMP   | Cognitive change    | Baseline NN  | nmol/L | Slope                 | 0        | 0          | NR          | Longitudinal change in MMSE score                                                          |
| Hsu 2018         | CHAMP   | Cognitive change    | Baseline NL  | nmol/L | Slope                 | 0.007    | -0.5-0.5   | NR          | Longitudinal change in MMSE score                                                          |
| Hsu 2018         | CHAMP   | Cognitive change    | Baseline LN  | nmol/L | Slope                 | -0.2     | -0.7-0.4   | NR          | Longitudinal change in MMSE score                                                          |
| Hsu 2018         | CHAMP   | Cognitive change    | Baseline LL  | nmol/L | Slope                 | -0.004   | -0.3-0.3   | NR          | Longitudinal change in MMSE score                                                          |
| Kische 2017[35]  | SHIP    | Cognitive change    | Baseline     | nmol/L | Slope                 | 0.02     | -0.15-0.20 | $\geq$ 0.05 | Longitudinal change in MMSE score after 5 years                                            |
| Kische 2017      | SHIP    | Cognitive change    | Baseline     | nmol/L | Slope                 | 0.01     | -0.22-0.24 | $\geq$ 0.05 | Longitudinal change in MMSE score after 10 years                                           |
| LeBlanc 2010[36] | MrOS US | Baseline cognition  | Baseline     | nmol/L | -                     | NR       | NR         | $\geq$ 0.29 | 3MS score (includes MMSE)                                                                  |
| LeBlanc 2010     | MrOS US | Follow-up cognition | Baseline     | nmol/L | -                     | NR       | NR         | $\geq$ 0.29 | 3MS score (includes MMSE)                                                                  |
| LeBlanc 2010     | MrOS US | Cognitive change    | Baseline     | nmol/L | -                     | NR       | NR         | $\geq$ 0.29 | 3MS score (includes MMSE)                                                                  |
| LeBlanc 2010     | MrOS US | Baseline cognition  | Baseline     | nmol/L | -                     | NR       | NR         | $\geq$ 0.63 | Trails B: test of executive function and motor speed                                       |
| LeBlanc 2010     | MrOS US | Follow-up cognition | Baseline     | nmol/L | -                     | NR       | NR         | $\geq$ 0.63 | Trails B: test of executive function and motor speed                                       |
| LeBlanc 2010     | MrOS US | Cognitive change    | Baseline     | nmol/L | -                     | NR       | NR         | $\geq$ 0.63 | Trails B: test of executive function and motor speed                                       |

\* NR = Not reported; NN = Normal ( $>10.2$  nmol/L) total testosterone (T), normal ( $>156$  pmol/L) calculated free testosterone (cFT); NL = normal T, low ( $<156$  pmol/L) cFT; LN = low ( $<10.2$  nmol/L) T, normal cFT; LL = low T, low cFT. MMSE = mini-mental state examination; 3MS = modified mini-mental state examination.

## Supplementary Material. Systematic review: associations of testosterone with men's health.

## 4. Figures.

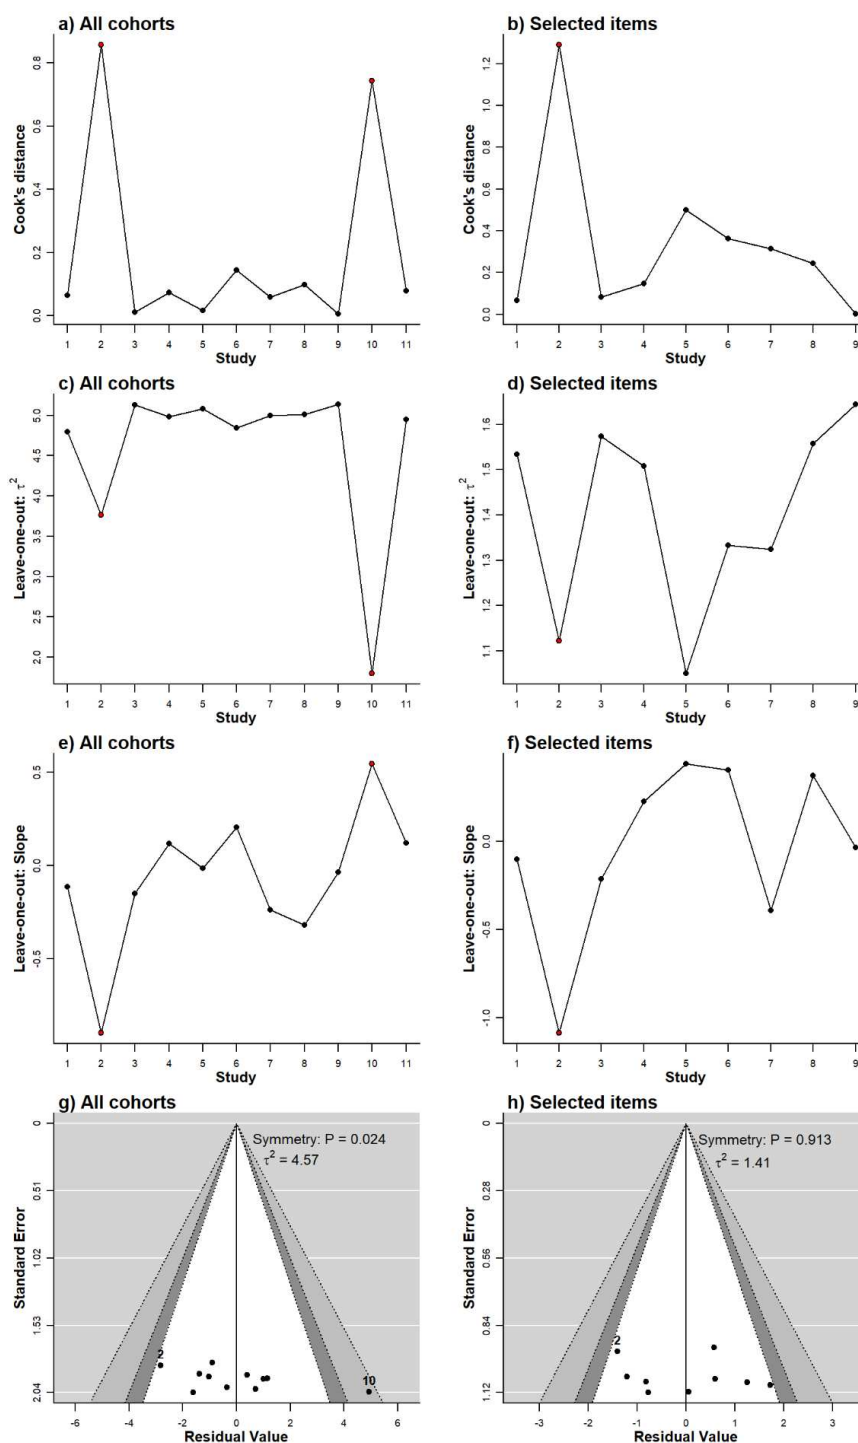

Supplementary figure 1. Meta-regression diagnostics. Meta-regression diagnostics showing the influence of studies on model fit (a,b),  $\tau^2$  (estimated amount of total heterogeneity: c,d), estimated slope (e,f), and distribution of residuals with funnel plots (g,h). Analysis repeated for all 11 cohort studies (a,c,e,g) and for 9 studies with selected articles (b,d,f,h). In cases where more than one article was available per cohort study, the article with the largest sample

*Supplementary Material. Systematic review: associations of testosterone with men's health.*

size was used. Highlighted estimates for cohort study 2 (BHS) were those from Chan et al.[18] (N=1,804) and for study 10 (FHS) were from Pencina et al.[12] (N=720). In funnel plots: light grey + dark grey + white shading = 99% pseudo confidence interval (CI); dark grey + white shading = 95% CI; white shading = 90% CI.

## Supplementary Material. Systematic review: associations of testosterone with men's health.

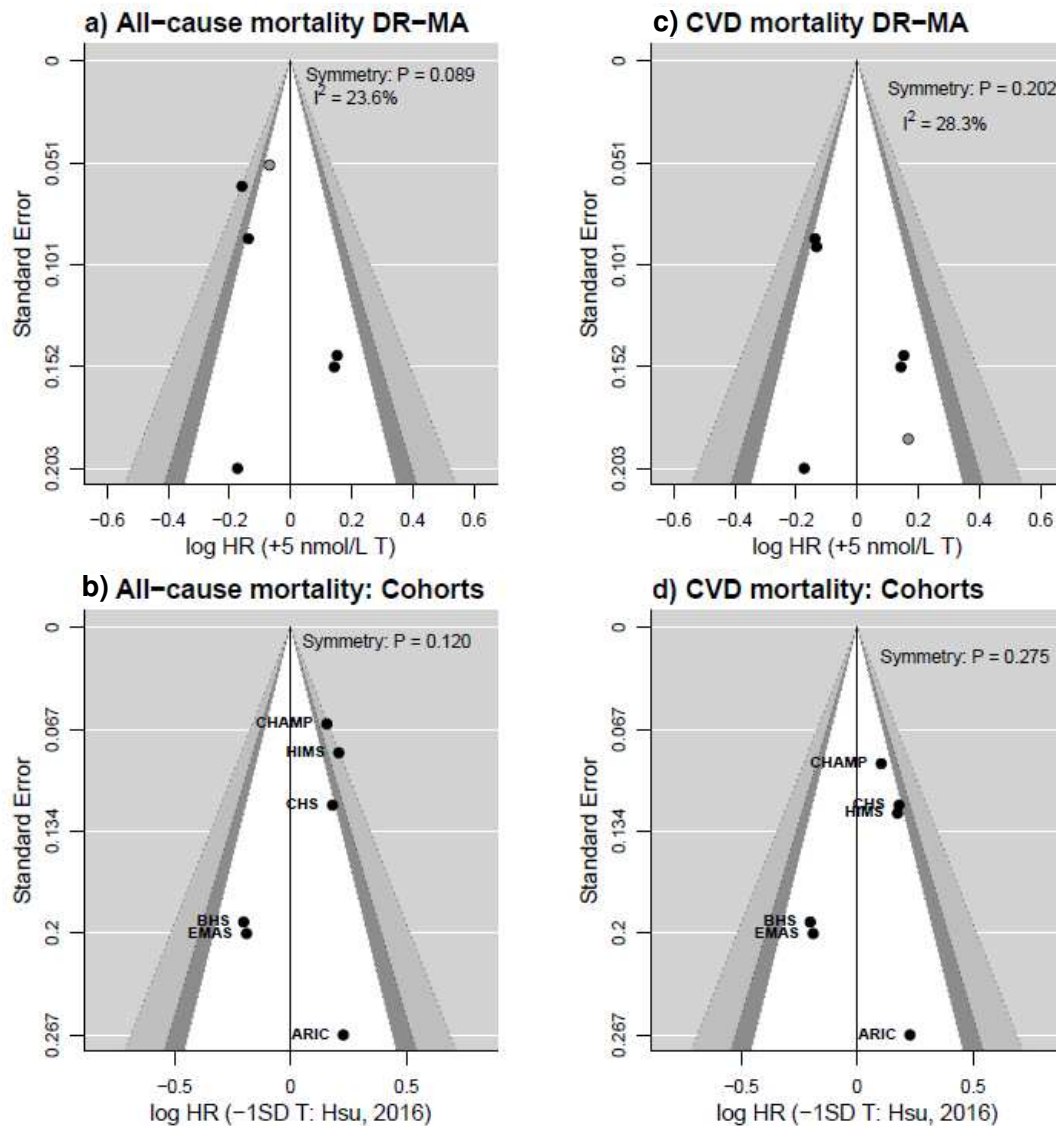

**Supplementary figure 2. Funnel plots for dose-response meta-analyses.** Contour-enhanced funnel plots showing the distribution of log hazard ratio (HR) estimates for all-cause mortality (a, b) and mortality caused by cardiovascular disease (CVD) (c, d) attributed to a 5 nmol/L increase (a, c), or a 1.9 nmol/L (1SD in Hsu et al. 2016[22]) decrease (b, d), in endogenous testosterone concentration. Log HR values and standard errors were calculated using generalised least squares regression of published estimates.[42, 43] In cases where more than one article was available per cohort study, the article with the largest sample size was used. Estimates represented by black dots in (a) and (c) were analysed in respective dose-response meta-analyses (DR-MA; results presented in Figs. 3, 4). The grey dot in (a) is the estimate for Yeap et al. 2014b[13] and in (c) is the estimate for Chasland et al. (2017)[19]; these estimates were substituted for others for the HIMS and BHS studies respectively for alternative summary estimates (i.e., the grey summary estimates presented in Figs. 3, 4). Estimates presented in (b) and (d) are shown for a more complete assessment of funnel plot symmetry: estimates are plotted for all studies with estimates, including those that did not have sufficient information for including in the DR-MA. In funnel plots: light grey + dark

## Supplementary Material. Systematic review: associations of testosterone with men's health.

grey + white shading = 99% pseudo confidence interval (CI); dark grey + white shading = 95% CI; white shading = 90% CI.

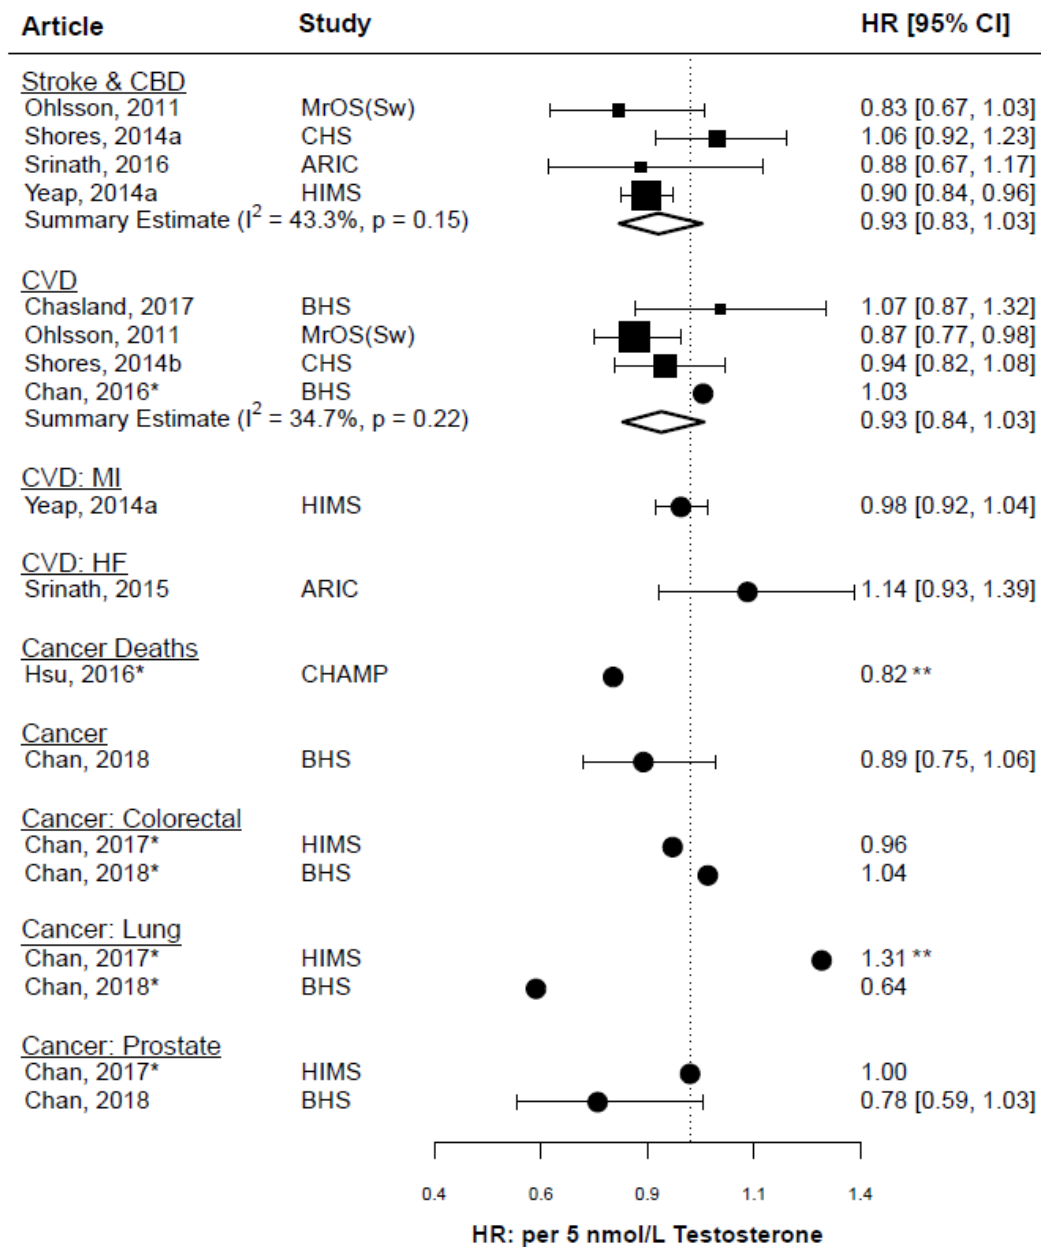

**Supplementary figure 3: Forest plot of published hazard ratio (HR) estimates: association of testosterone with other AIMS outcomes.** Plotted estimates for other outcomes, as listed in the AIMS protocol article,[3] have been standardised to the HR for a 5nmol/L increase in testosterone. The size of squares are scaled to the precision of estimates, as used for obtaining the corresponding summary estimate for that outcome (diamonds). Estimates presented as circles were not used to obtain a summary estimate and so the size of circles is not scaled to estimated precision. \* = 95 % confidence intervals (CIs) were not calculable for these

*Supplementary Material. Systematic review: associations of testosterone with men's health.*

estimates, which were reported as the HR per standard deviation change (see Supplementary table 9).

\*\* = for 'per SD' estimates: to show that the published HR 95% CIs did not overlap 1. 'CBD' = Cerebrovascular disease; 'CVD' = cardiovascular disease; 'MI' = myocardial infarction; 'HF' = heart failure. Study-specific estimates presented for MrOS Sweden (Ohlsson, 2011)[33]; CHS (Shores, 2014a, b)[25-26]; ARIC (Srinath, 2015; 2016)[16-17]; HIMS (Yeap, 2014a, b)[13,31]; BHS (Chan, 2016; Chasland, 2017; Chan, 2018)[18-20].

## 5. References cited.

1. MedNar: Deep Web Technologies.
2. OpenGrey: GreyNet International.
3. Yeap BB, Marriott RJ, Adams RJ, *et al.* Androgens In Men Study (AIMS): protocol for meta-analyses of individual participant data investigating associations of androgens with health outcomes in men. *BMJ Open* 2020;10:e034777.
4. Handelsman DJ, Wartofsky L. Requirement for mass spectrometry sex steroid assays in the Journal of Clinical Endocrinology and Metabolism. *J Clin Endocrinol Metab* 2013;98:3971-73.
5. Endnote X8: Clarivate Analytics, 2019
6. Ouzzani M, Hammady H, Fedorowicz Z, *et al.* Rayyan - a web and mobile app for systematic reviews. *Syst Rev* 2016;5:210.
7. Borenstein M, Hedges LV, Higgins JPT, *et al.* Introduction to Meta-Analysis. West Sussex: John Wiley & Sons Ltd 2009.
8. Grant JF, Martin SA, Taylor AW, *et al.* Cohort profile: The men androgen inflammation lifestyle environment and stress (MAILES) study. *Int J Epidemiol* 2014;43:1040-53.
9. Arnlov J, Pencina MJ, Amin S, *et al.* Endogenous sex hormones and cardiovascular disease incidence in men. *Ann Intern Med* 2006;145:176-84.
10. Haring R, Teng Z, Xanthakis V, *et al.* Association of sex steroids, gonadotrophins, and their trajectories with clinical cardiovascular disease and all-cause mortality in elderly men from the Framingham Heart Study. *Clin Endocrinol* 2013;78:629-34.
11. Bhasin S, Pencina MJ, Kaur Jasuja G, *et al.* Reference ranges for testosterone in men generated using liquid chromatography tandem mass spectrometry in a community-base sample of healthy nonobese young men in the Framingham Heart Study and applied to three geographically distinct cohorts. *J Clin Endocrinol Metab* 2011;96:2430-39.
12. Pencina KM, Travison TG, Bhasin S, *et al.* Endogenous circulating testosterone and sex hormone-binding globulin levels and measures of myocardial structure and function: the Framingham Heart Study. *Andrology* 2019;7:307-14.
13. Yeap BB, Alfonso H, Chubb SAP, *et al.* In older men an optimal plasma testosterone is associated with reduced all-cause mortality and higher dihydrotestosterone with reduced ischemic heart disease mortality, while estradiol levels do not predict mortality. *J Clin Endocrinol Metab* 2014;99:E9-E18.
14. Sueoka KT, Ewing MS, Ensrud KE, *et al.* Higher endogenous testosterone levels associated with increased risk of coronary heart disease in elderly men: a prospective study. *Endocr Rev* 2010;31:S858.
15. Holmegard HN, Nordestgaard BG, Jensen GB, *et al.* Sex hormones and ischemic stroke: a prospective cohort study and meta-analyses. *J Clin Endocrinol Metab* 2016;101:69-78.
16. Srinath R, Hill Golden S, Carson KA. Endogenous Testosterone and its Relationship to Preclinical and Clinical Measures of Cardiovascular Disease in the Atherosclerosis Risk in Communities Study. *J Clin Endocrinol Metab* 2015;100:1602-02.



*Supplementary Material. Systematic review: associations of testosterone with men's health.*

17. Srinath R, Gottesman RF, Hill Golden S, *et al.* Association Between Endogenous Testosterone and Cerebrovascular Disease in the ARIC Study (Atherosclerosis Risk in Communities). *Stroke* 2016;47:2682-88.
18. Chan YX, Knuiman MW, Hung J, *et al.* Neutral associations of testosterone, dihydrotestosterone and estradiol with fatal and non-fatal cardiovascular events, and mortality in men aged 17-97 years. *Clin Endocrinol* 2016;85:575-82.
19. Chasland LC, Knuiman MW, Divitini ML, *et al.* Greater physical activity and higher androgen concentrations are independently associated with lower cardiometabolic risk in men. *Clin Endocrinol* 2017;87:466-74.
20. Chan YX, Knuiman MW, Divitini ML, *et al.* Lower Circulating Androgens Are Associated with Overall Cancer Risk and Prostate Cancer Risk in Men Aged 25-84 Years from the Busselton Health Study. *Horm Cancer* 2018;9:391-98.
21. Hsu B, Cumming RG, Waite LM, *et al.* Longitudinal Relationships between Reproductive Hormones and Cognitive Decline in Older Men: The Concord Health and Ageing in Men Project. *J Clin Endocrinol Metab* 2015;100:2223-30.
22. Hsu B, Cumming RG, Naganathan V, *et al.* Temporal Changes in Androgens and Estrogens Are Associated With All-Cause and Cause-Specific Mortality in Older Men. *J Clin Endocrinol Metab* 2016;101:2201-10.
23. Hsu B, Cumming RG, Blyth FM, *et al.* Evaluating Calculated Free Testosterone as a Predictor of Morbidity and Mortality Independent of Testosterone for Cross-sectional and 5-Year Longitudinal Health Outcomes in Older Men: The Concord Health and Ageing in Men Project. *J Gerontol A Biol Sci Med Sci* 2018;73:729-36.
24. Rosenberg MA, Shores MM, Matsumoto AM, *et al.* Serum androgens and risk of atrial fibrillation in older men: The Cardiovascular Health Study. *Clin Cardiol* 2018;41:830-36.
25. Shores MM, Arnold AM, Biggs ML, *et al.* Testosterone and dihydrotestosterone and incident ischaemic stroke in men in the Cardiovascular Health Study. *Clin Endocrinol* 2014;81:746-53.
26. Shores MM, Biggs ML, Arnold AM, *et al.* Testosterone, dihydrotestosterone, and incident cardiovascular disease and mortality in the cardiovascular health study. *J Clin Endocrinol Metab* 2014;99:2061-8.
27. Lee DM, Pye SR, Tajar A, *et al.* Cohort profile: the European Male Ageing Study. *Int J Epidemiol* 2013;42(2):391-401.
28. Pye SR, Huhtaniemi IT, Finn JD, *et al.* Late-onset hypogonadism and mortality in aging men. *J Clin Endocrinol Metab* 2014;99:1357-66.
29. Chan YX, Alfonso H, Chubb SA, *et al.* Higher Dihydrotestosterone Is Associated with the Incidence of Lung Cancer in Older Men. *Horm Cancer* 2017;8:119-26.
30. Ford AH, Yeap BB, Flicker L, *et al.* Sex hormones and incident dementia in older men: The health in men study. *Psychoneuroendocrinology* 2018;98:139-47.
31. Yeap BB, Alfonso H, Chubb SA, *et al.* In older men, higher plasma testosterone or dihydrotestosterone is an independent predictor for reduced incidence of stroke but not myocardial infarction. *J Clin Endocrinol Metab* 2014;99:4565-73.
32. Ohlsson C, Labrie F, Barrett-Connor E, *et al.* Low serum levels of dehydroepiandrosterone sulfate predict all-cause and cardiovascular mortality in elderly Swedish men. *J Clin Endocrinol Metab* 2010;95:4406-14.
33. Ohlsson C, Barrett-Connor E, Bhasin S, *et al.* High serum testosterone is associated with reduced risk of cardiovascular events in elderly men. The MrOS (Osteoporotic Fractures in Men) study in Sweden. *J Am Coll Cardiol* 2011;58:1674-81.
34. Tivesten Å, Vandenput L, Carlzon D, *et al.* Dehydroepiandrosterone and its sulfate predict the 5-year risk of coronary heart disease events in elderly men. *J Am Coll Cardiol* 2014;64(17):1801-10.



*Supplementary Material. Systematic review: associations of testosterone with men's health.*

35. Kische H, Gross S, Wallaschofski H, *et al.* Associations of androgens with depressive symptoms and cognitive status in the general population. *PLoS ONE* 2017;12:e0177272.
36. LeBlanc ES, Wang PY, Janowsky JS, *et al.* Association between sex steroids and cognition in elderly men. *Clin Endocrinol* 2010;72:393-403.
37. Magnani JW, Moser CB, Murabito JM, *et al.* Association of sex hormones, aging, and atrial fibrillation in men: The Framingham Heart Study. *Circ Arrhythm Electrophysiol* 2014;7:307-12.
38. D'Agostino RB, Vasan RS, Pencina MJ, *et al.* General cardiovascular risk profile for use in primary care: The Framingham Heart Study. *Circulation* 2008;117:743-53.
39. Murabito JM, Rosenberg CL, Finger D, *et al.* A genome-wide association study of breast and prostate cancer in the NHLBI's Framingham Heart Study. *BMC Med Genet* 2007; 8(Suppl I).
40. Li JJ, Wittert GA, Vincent A, *et al.* Muscle grip strength predicts incident type 2 diabetes: population-based cohort study. *Metab Clin Exp* 2016;65:883-92.
41. McGrath S, Zhao X, Steele R, *et al.* Estimating the sample mean and standard deviation from commonly reported quantiles in meta-analysis. *Stat Methods Med Res* 2020;29:2520-37.
42. Greenland S, Longnecker MP. Methods for trend estimation from summarized dose-response data, with applications to meta-analysis. *Am J Epidemiol* 1992;135:1301-09.
43. Orsini N, Bellocco R, Greenland S. Generalized least squares for trend estimation of summarized dose-response data. *Stata J* 2006;6:40-57.
